# Supplementary material for: Adenosine deaminase for diagnosis of tuberculous pleural effusion: A systematic review and meta-analysis
Source: PubMed Central journal article supplement (PMC6435228; doi:10.1371/journal.pone.0213728), 2019-03-26

**S1 Fig.** Risk of bias and applicability concerns summary

|                        | Risk of Bias      |            |                    |                 | Applicability Concerns |            |                    |                       | Risk of Bias      |            |                    |                   | Applicability Concerns |                    |                   |                     | Risk of Bias |                    |                   |            | Applicability Concerns |   |   |
|------------------------|-------------------|------------|--------------------|-----------------|------------------------|------------|--------------------|-----------------------|-------------------|------------|--------------------|-------------------|------------------------|--------------------|-------------------|---------------------|--------------|--------------------|-------------------|------------|------------------------|---|---|
|                        | Patient Selection | Index Test | Reference Standard | Flow and Timing | Patient Selection      | Index Test | Reference Standard |                       | Patient Selection | Index Test | Reference Standard | Patient Selection | Index Test             | Reference Standard | Patient Selection |                     | Index Test   | Reference Standard | Patient Selection | Index Test | Reference Standard     |   |   |
| Piras, 1978            | ?                 | -          | ?                  | +               | +                      | +          | +                  | Porcel, 2003          | -                 | -          | -                  | +                 | -                      | +                  | +                 | Khan, 2013          | +            | -                  | +                 | +          | +                      | + | + |
| Blake, 1982            | +                 | -          | ?                  | +               | -                      | +          | +                  | Tahhan, 2003          | +                 | -          | +                  | -                 | +                      | +                  | +                 | Khow-Ean, 2013      | -            | -                  | +                 | +          | -                      | + | + |
| Maritz, 1982           | +                 | -          | +                  | +               | -                      | +          | +                  | Chen, 2004            | -                 | -          | ?                  | +                 | -                      | +                  | +                 | Lee, 2013           | -            | -                  | +                 | +          | -                      | + | + |
| Petterson, 1984        | +                 | -          | +                  | +               | -                      | +          | +                  | Ghanei, 2004          | +                 | -          | +                  | +                 | -                      | +                  | +                 | Sahn, 2013          | -            | -                  | +                 | +          | -                      | + | + |
| Niwa, 1985             | -                 | -          | +                  | -               | -                      | +          | +                  | Poyraz, 2004          | ?                 | -          | +                  | +                 | -                      | +                  | +                 | Tay, 2013           | -            | -                  | +                 | +          | +                      | + | + |
| Raj, 1985              | +                 | -          | +                  | +               | -                      | +          | +                  | Gaga, 2005            | -                 | -          | +                  | +                 | -                      | +                  | +                 | Wu, 2013            | -            | -                  | +                 | +          | -                      | + | + |
| Sinha, 1987            | +                 | -          | ?                  | -               | -                      | +          | +                  | Gao, 2005             | -                 | -          | ?                  | +                 | -                      | +                  | +                 | Abrao, 2014         | +            | -                  | +                 | +          | +                      | + | + |
| Strankinga, 1987       | +                 | -          | +                  | -               | -                      | +          | +                  | Moon, 2005            | +                 | -          | +                  | +                 | +                      | +                  | +                 | Anwar, 2014         | +            | -                  | ?                 | +          | -                      | + | + |
| Teo, 1987              | +                 | -          | +                  | +               | -                      | +          | +                  | Okamoto, 2005         | -                 | -          | +                  | +                 | -                      | +                  | +                 | Kong, 2014          | +            | -                  | +                 | +          | -                      | + | + |
| van Keimpema, 1987     | +                 | -          | +                  | +               | -                      | +          | +                  | Sharma, 2005          | +                 | -          | +                  | +                 | +                      | +                  | +                 | Li, 2014            | -            | -                  | +                 | +          | -                      | + | + |
| Fontan Bueso, 1988     | -                 | -          | +                  | +               | -                      | +          | +                  | Tozkoparan, 2005      | -                 | -          | -                  | -                 | -                      | +                  | +                 | Liao, 2014          | +            | -                  | -                 | +          | -                      | + | + |
| Kao, 1988              | +                 | -          | +                  | +               | -                      | -          | +                  | Celik, 2006           | ?                 | -          | +                  | +                 | +                      | +                  | +                 | Mehta, 2014         | +            | -                  | ?                 | +          | +                      | + | + |
| Kim, 1988              | ?                 | -          | -                  | +               | -                      | +          | +                  | Mishra, 2006          | +                 | -          | -                  | +                 | +                      | +                  | +                 | Meldau, 2014        | +            | -                  | +                 | -          | -                      | + | + |
| Tamura, 1988           | ?                 | -          | ?                  | -               | -                      | -          | +                  | Morimoto, 2006        | ?                 | -          | ?                  | +                 | -                      | +                  | +                 | Rahim, 2014         | -            | -                  | +                 | -          | -                      | + | - |
| Gilhotra, 1989         | +                 | -          | +                  | +               | -                      | +          | +                  | Antonangelo, 2007     | -                 | -          | -                  | +                 | -                      | +                  | +                 | Reis, 2014          | +            | -                  | ?                 | +          | +                      | + | + |
| Hsu, 1989              | -                 | -          | +                  | +               | -                      | +          | +                  | Ariga, 2007           | -                 | -          | +                  | +                 | -                      | +                  | +                 | Sanchez-Otero, 2014 | ?            | -                  | ?                 | -          | +                      | + | + |
| Moriwaki, 1989         | -                 | -          | +                  | +               | +                      | +          | +                  | Cok, 2007             | -                 | -          | -                  | +                 | -                      | +                  | +                 | Sethi, 2014         | +            | +                  | -                 | +          | +                      | + | + |
| Segura, 1989           | +                 | -          | +                  | +               | -                      | +          | +                  | Daniil, 2007          | +                 | -          | +                  | +                 | +                      | +                  | +                 | Trajman, 2014       | -            | -                  | -                 | -          | -                      | + | + |
| Gourgoulianis, 1990    | ?                 | -          | +                  | ?               | ?                      | +          | +                  | Lamsal, 2007          | ?                 | -          | -                  | +                 | ?                      | +                  | +                 | Valdes, 2014        | -            | -                  | +                 | +          | -                      | + | + |
| Gupta, 1990            | -                 | -          | +                  | +               | +                      | +          | +                  | Moon, 2007            | +                 | -          | +                  | +                 | +                      | +                  | +                 | Yurt, 2014          | -            | -                  | +                 | +          | +                      | + | + |
| Banales, 1991          | +                 | -          | +                  | +               | +                      | +          | +                  | Neves, 2007           | -                 | -          | +                  | +                 | +                      | +                  | +                 | Agha, 2015          | -            | -                  | +                 | +          | -                      | + | + |
| Lopez Jimenez, 1991    | ?                 | -          | ?                  | +               | -                      | +          | +                  | Trajman, 2007         | -                 | -          | +                  | -                 | -                      | +                  | +                 | Ali, 2015           | -            | -                  | +                 | +          | -                      | + | + |
| Maartens, 1991         | -                 | -          | +                  | -               | -                      | +          | +                  | Xue, 2007             | -                 | -          | +                  | +                 | -                      | +                  | +                 | Arnold, 2015        | +            | -                  | +                 | +          | -                      | + | + |
| Hara, 1992             | +                 | -          | +                  | +               | +                      | +          | +                  | Baba, 2008            | -                 | -          | +                  | -                 | -                      | +                  | +                 | Behrsin, 2015       | +            | -                  | +                 | +          | -                      | + | + |
| Kaur, 1992             | +                 | -          | +                  | +               | -                      | +          | +                  | Bandyopadhyay, 2008   | -                 | -          | ?                  | +                 | -                      | +                  | +                 | Farhana, 2015       | +            | -                  | -                 | +          | +                      | + | + |
| Muranishi, 1992        | -                 | -          | +                  | +               | -                      | +          | +                  | Krenke, 2008          | -                 | -          | +                  | +                 | -                      | +                  | +                 | He, 2015            | -            | -                  | +                 | +          | +                      | + | + |
| Nagaraja, 1992         | +                 | -          | +                  | +               | -                      | +          | +                  | Verma, 2008           | +                 | -          | +                  | +                 | +                      | +                  | +                 | Klimiuk, 2015       | -            | -                  | +                 | +          | -                      | + | + |
| Perez-Rodriguez, 1992  | +                 | -          | ?                  | +               | -                      | +          | +                  | Zaric, 2008           | -                 | -          | +                  | +                 | -                      | +                  | +                 | Koser, 2015         | +            | -                  | +                 | +          | +                      | + | + |
| Prasad, 1992           | ?                 | -          | +                  | +               | -                      | +          | +                  | Chang, 2009           | -                 | -          | +                  | +                 | +                      | +                  | +                 | Kumar, 2015         | +            | -                  | +                 | +          | +                      | + | + |
| Hsu, 1993              | -                 | -          | +                  | +               | -                      | +          | +                  | Dhedag, 2009          | +                 | +          | +                  | +                 | +                      | +                  | +                 | Li, 2015            | -            | -                  | +                 | +          | +                      | + | + |
| Valdes, 1993           | +                 | -          | +                  | -               | -                      | +          | +                  | Kupeli, 2009          | +                 | -          | ?                  | -                 | -                      | +                  | +                 | Saiphoklang, 2015   | -            | -                  | -                 | +          | -                      | + | + |
| Aoki, 1994             | +                 | -          | +                  | +               | -                      | +          | +                  | Valdes, 2009          | +                 | -          | +                  | +                 | +                      | +                  | +                 | Shu, 2015           | -            | -                  | +                 | +          | +                      | + | + |
| Chiang, 1994           | ?                 | -          | +                  | +               | -                      | +          | +                  | Zemlin, 2009          | -                 | -          | +                  | -                 | -                      | +                  | +                 | Skouras, 2015       | -            | -                  | +                 | +          | +                      | + | + |
| De Olivera, 1994       | +                 | +          | -                  | +               | -                      | +          | +                  | Ciledag, 2010         | ?                 | -          | +                  | +                 | -                      | +                  | +                 | Tural Onur, 2015    | +            | -                  | +                 | +          | +                      | + | + |
| Richter, 1994          | +                 | -          | +                  | +               | +                      | +          | +                  | Gupta, 2010           | +                 | -          | -                  | +                 | +                      | +                  | +                 | Yoshino, 2015       | -            | -                  | +                 | +          | +                      | + | + |
| Burgess, 1995          | +                 | -          | +                  | +               | -                      | +          | +                  | Katiyar, 2010         | +                 | -          | -                  | +                 | +                      | +                  | +                 | Biswas, 2016        | +            | -                  | +                 | +          | -                      | + | - |
| Querol, 1995           | +                 | -          | +                  | +               | -                      | +          | +                  | Pandit, 2010          | +                 | -          | -                  | +                 | +                      | +                  | +                 | Coral-Gudino, 2016  | -            | -                  | +                 | +          | -                      | + | + |
| Valdes, 1995           | +                 | -          | +                  | +               | +                      | +          | +                  | Porcel, 2010          | -                 | -          | +                  | +                 | -                      | +                  | +                 | Kim, 2016           | -            | -                  | +                 | +          | +                      | + | + |
| Orphanidou, 1996       | ?                 | -          | +                  | +               | -                      | +          | +                  | Song, 2010            | ?                 | -          | +                  | ?                 | +                      | +                  | +                 | Lee, 2016           | -            | -                  | +                 | +          | -                      | + | + |
| Valdes, 1996           | +                 | -          | +                  | +               | -                      | +          | +                  | Valdes, 2010          | +                 | -          | +                  | +                 | +                      | +                  | +                 | Liu, 2016           | +            | -                  | +                 | +          | +                      | + | + |
| Villena, 1996          | +                 | -          | +                  | +               | -                      | +          | +                  | Wu, 2010              | -                 | -          | +                  | +                 | -                      | +                  | +                 | Mallik, 2016        | +            | -                  | -                 | +          | +                      | + | + |
| Ogawa, 1997            | -                 | -          | +                  | +               | -                      | +          | +                  | Ambade, 2011          | +                 | -          | +                  | -                 | +                      | +                  | +                 | Michot, 2016        | +            | -                  | +                 | +          | +                      | + | + |
| Kuralay, 1998          | ?                 | -          | +                  | +               | -                      | +          | +                  | Bhutia, 2011          | +                 | -          | ?                  | +                 | -                      | +                  | +                 | Rahman, 2016        | -            | -                  | +                 | +          | +                      | + | + |
| Ghelani, 1999          | +                 | -          | -                  | +               | -                      | +          | +                  | Kalantri, 2011        | +                 | -          | -                  | +                 | -                      | +                  | +                 | Saiphoklang, 2016   | +            | -                  | -                 | +          | +                      | + | + |
| Perez-Rodriguez, 1999  | +                 | -          | +                  | +               | -                      | +          | +                  | Liu, 2011             | -                 | -          | +                  | +                 | -                      | +                  | +                 | Suleman, 2016       | +            | +                  | +                 | +          | +                      | + | + |
| Riantawan, 1999        | +                 | -          | ?                  | +               | -                      | +          | +                  | Ogata, 2011           | +                 | -          | +                  | +                 | -                      | +                  | +                 | Che, 2017           | +            | -                  | +                 | +          | +                      | ? | + |
| San Jose, 1999         | +                 | -          | +                  | +               | -                      | +          | +                  | Yildiz, 2011          | -                 | -          | +                  | +                 | -                      | +                  | +                 | Chung, 2017         | +            | -                  | +                 | -          | +                      | + | + |
| Gorguner, 2000         | +                 | -          | +                  | +               | -                      | +          | +                  | Antonangelo, 2012     | -                 | -          | ?                  | +                 | -                      | +                  | +                 | El Hoshy, 2017      | -            | -                  | +                 | +          | -                      | + | + |
| Prandaman, 2000        | +                 | -          | ?                  | -               | -                      | +          | -                  | Cirak, 2012           | ?                 | -          | +                  | +                 | -                      | +                  | +                 | Kim, 2017           | -            | -                  | +                 | -          | -                      | ? | + |
| Villegas, 2000         | +                 | -          | +                  | +               | -                      | +          | +                  | Demirer, 2012         | -                 | -          | +                  | +                 | -                      | +                  | +                 | Sivakumar, 2017     | -            | -                  | +                 | ?          | -                      | + | + |
| Nagesh, 2001           | +                 | -          | +                  | +               | -                      | +          | +                  | Devkota, 2012         | +                 | -          | -                  | +                 | -                      | +                  | +                 | Xu, 2017            | +            | -                  | +                 | +          | +                      | + | + |
| Reechaipichitkul, 2001 | +                 | -          | +                  | +               | +                      | +          | +                  | Garcia-Zamalloa, 2012 | +                 | -          | -                  | +                 | -                      | +                  | +                 | Zhang, 2017         | +            | -                  | +                 | -          | +                      | + | + |
| Sharma, 2001           | +                 | -          | -                  | +               | -                      | +          | +                  | Kashiwabara, 2012     | +                 | -          | -                  | +                 | +                      | +                  | +                 | Blakiston, 2018     | -            | -                  | -                 | ?          | +                      | + | + |
| Yamada, 2001           | ?                 | -          | +                  | +               | -                      | +          | +                  | Kumar, 2012           | +                 | -          | -                  | +                 | +                      | +                  | -                 | Chang, 2018         | +            | -                  | +                 | -          | -                      | + | + |
| Andreasyan, 2002       | +                 | -          | ?                  | +               | +                      | +          | +                  | Pal, 2012             | ?                 | -          | ?                  | +                 | -                      | +                  | +                 | He, 2018            | -            | -                  | +                 | -          | +                      | + | + |
| Jimenez, 2002          | -                 | -          | +                  | +               | +                      | +          | +                  | Wang, 2012            | +                 | -          | +                  | +                 | -                      | +                  | +                 | Hong, 2018          | -            | -                  | +                 | +          | -                      | + | + |
| Diacon, 2003           | +                 | -          | +                  | +               | +                      | +          | +                  | Kelam, 2013           | +                 | -          | +                  | +                 | +                      | +                  | +                 | Santos, 2018        | -            | -                  | +                 | +          | +                      | + | + |
| Lima, 2003             | +                 | -          | -                  | +               | +                      | +          | +                  | Keng, 2013            | +                 | -          | +                  | +                 | -                      | +                  | +                 | Wang, 2018          | +            | -                  | +                 | +          | +                      | + | + |

+ Low - High ? Unclear

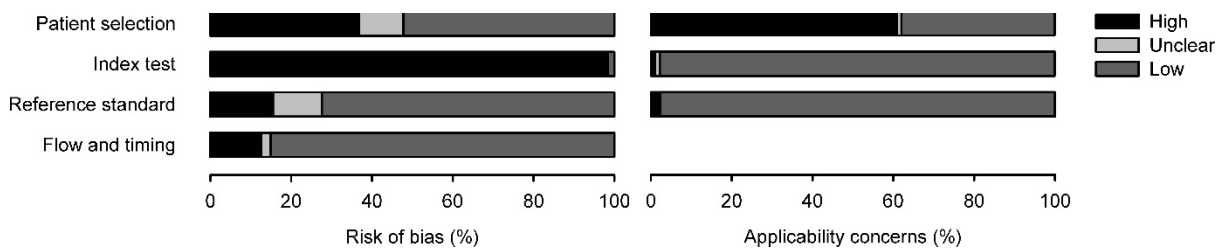

Supplement: pone.0213728.s001.pdf [file pone.0213728.s001.pdf]
