# Supplementary material for: Adenosine deaminase for diagnosis of tuberculous pleural effusion: A systematic review and meta-analysis
Source: PubMed Central journal article supplement (PMC6435228; doi:10.1371/journal.pone.0213728), 2019-03-26

**S2 Fig.** Diagnostic accuracy as a function of pleural fluid adenosine deaminase (ADA) threshold value in various studies. A simple linear regression line has been fitted to each scatterplot.

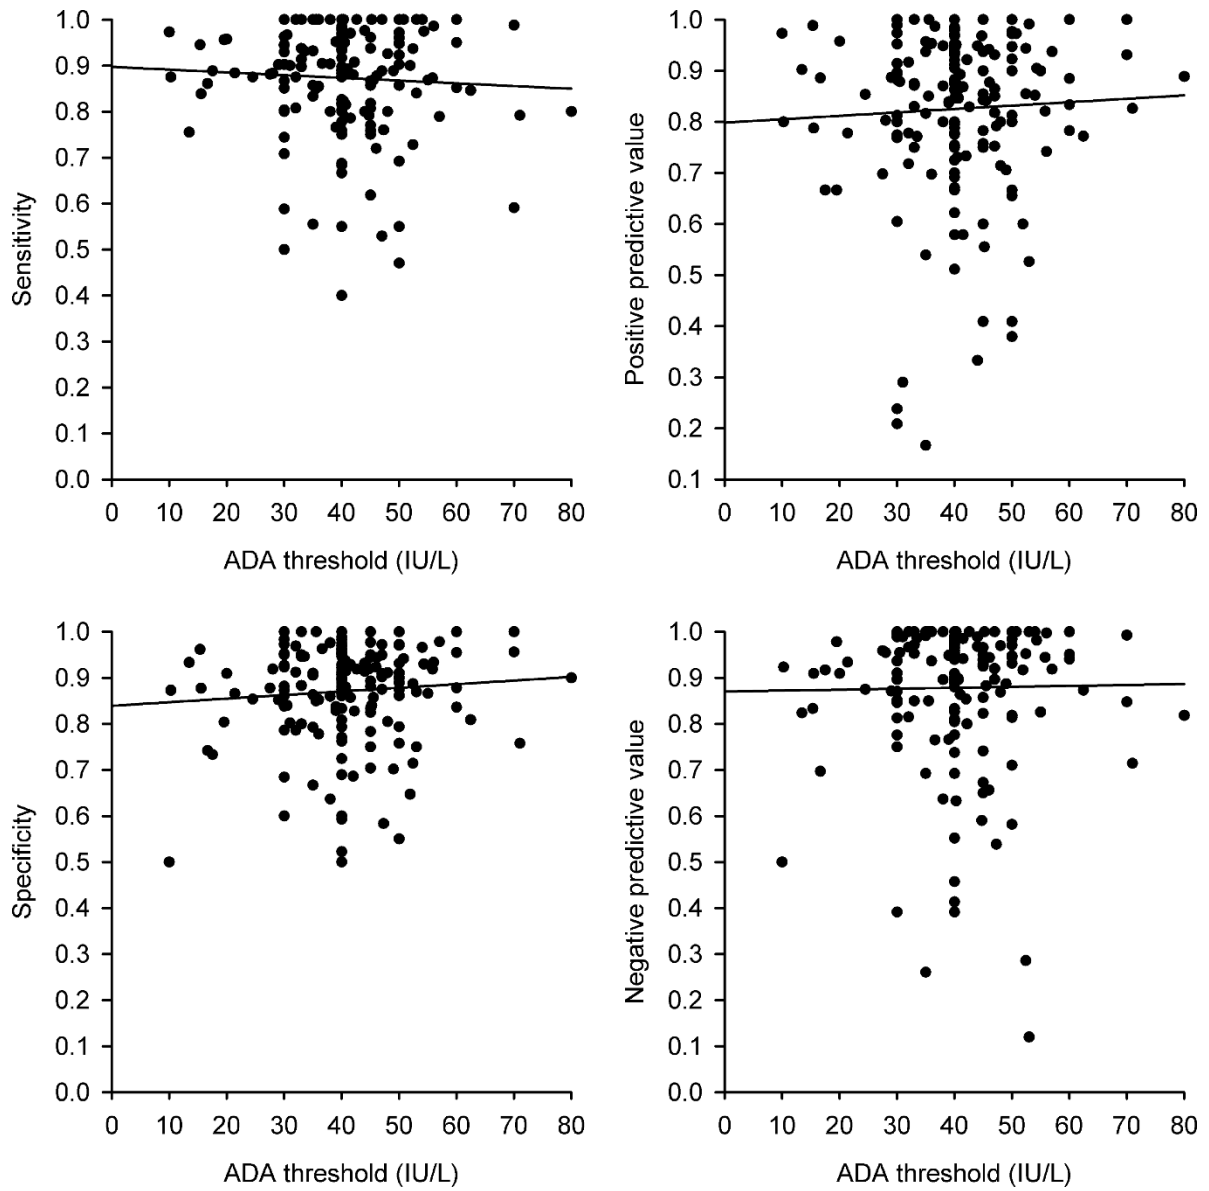

Supplement: pone.0213728.s002.pdf [file pone.0213728.s002.pdf]
