# Supplementary material for: Adenosine deaminase for diagnosis of tuberculous pleural effusion: A systematic review and meta-analysis
Source: PubMed Central journal article supplement (PMC6435228; doi:10.1371/journal.pone.0213728), 2019-03-26

**S4 Fig.** Bayesian conditional probability plots for pleural fluid adenosine deaminase (ADA) assay. The curves depict estimated post-test probability of tuberculous pleural effusion in a patient, given a pre-test probability of disease and a positive or negative ADA result, using summary estimates of ADA sensitivity and specificity derived during meta-analysis.

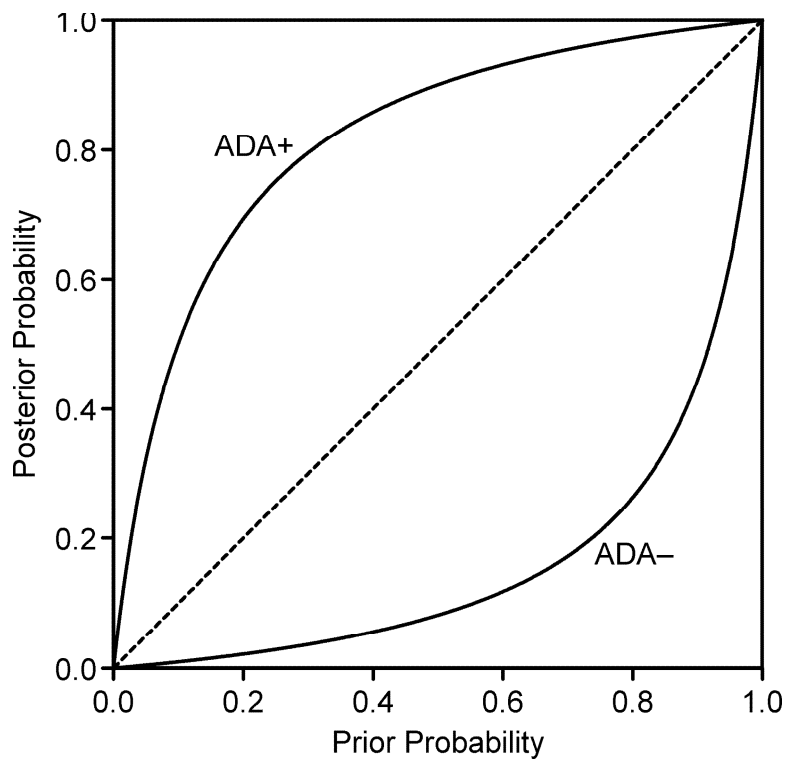

Supplement: pone.0213728.s004.pdf [file pone.0213728.s004.pdf]
