# Supplementary material for: Adenosine deaminase for diagnosis of tuberculous pleural effusion: A systematic review and meta-analysis
Source: PubMed Central journal article supplement (PMC6435228; doi:10.1371/journal.pone.0213728), 2019-03-26
Supplement: pone.0213728.s006.pdf [file pone.0213728.s006.pdf]

**S2 Table.** Characteristics of studies included in data synthesis.

| Author, year           | Country of study | Prospective study | Case control design | Inclusion criteria                                       | Exclusion criteria                                                      | HIV+ patients | Standard for TB diagnosis | Definite TB* | Funding source                 |
|------------------------|------------------|-------------------|---------------------|----------------------------------------------------------|-------------------------------------------------------------------------|---------------|---------------------------|--------------|--------------------------------|
| Piras, 1978[1]         | Italy            | Yes               | No                  | NS                                                       | NS                                                                      | NS            | NS                        | NS           | NS                             |
| Blake, 1982[2]         | South Africa     | Yes               | No                  | NS                                                       | NS                                                                      | NS            | CMP                       | NS           | NS                             |
| Maritz, 1982[3]        | South Africa     | Yes               | No                  | NS                                                       | Incomplete data, no final diagnosis                                     | NS            | CMP                       | 68.2%        | NS                             |
| Petterson, 1984[4]     | Finland          | Yes               | No                  | Inpatients with effusion                                 | NS                                                                      | NS            | CMP                       | 73.7%        | Multiple professional agencies |
| Niwa, 1985[5]          | Japan            | No                | Yes                 | Confirmed tuberculous or malignant effusion              | NS                                                                      | NS            | MP                        | 100%         | NS                             |
| Raj, 1985[6]           | India            | No                | No                  | NS                                                       | NS                                                                      | NS            | MP                        | 100%         | NS                             |
| Sinha, 1987[7]         | India            | Yes               | No                  | Patients with first episode of pleural effusion          | No final diagnosis                                                      | NS            | CMP                       | NS           | NS                             |
| Strankinga, 1987[8]    | Netherlands      | Yes               | No                  | Inpatients with effusion                                 | Hematologic malignancy, rheumatoid arthritis (due to very few patients) | NS            | MP                        | 100%         | NS                             |
| Teo, 1987[9]           | Singapore        | Yes               | No                  | Patients >12 years admitted with effusion                | NS                                                                      | NS            | CMP                       | 88.0%        | Government                     |
| van Keimpema, 1987[10] | Netherlands      | No                | No                  | Stored pleural fluid samples                             | NS                                                                      | NS            | M                         | 100%         | NS                             |
| Fontan Bueso, 1988[11] | Spain            | Yes               | No                  | Inpatients with effusion                                 | NS                                                                      | NS            | MP                        | 100%         | NS                             |
| Kao, 1988[12]          | Taiwan           | Yes               | No                  | Inpatients with effusion                                 | NS                                                                      | NS            | MP                        | 100%         | NS                             |
| Kim, 1988[13]          | Korea            | Yes               | No                  | Inpatients with effusion                                 | NS                                                                      | NS            | NS                        | NS           | NS                             |
| Tamura, 1988[14]       | Japan            | No                | No                  | NS                                                       | NS                                                                      | NS            | CMP                       | NS           | NS                             |
| Gilhotra, 1989[15]     | India            | No                | No                  | Pleural effusion with proven histo/cytological diagnosis | NS                                                                      | NS            | P                         | 100%         | NS                             |
| Hsu, 1989[16]          | Taiwan           | No                | No                  | Inpatients with effusion                                 | NS                                                                      | NS            | MP                        | 100%         | NS                             |
| Moriwaki, 1989[17]     | Japan            | No                | Yes                 | NS                                                       | NS                                                                      | NS            | MP                        | 100%         | NS                             |

|                           |              |     |     |                                                                                                   |                                                      |       |     |       |                           |
|---------------------------|--------------|-----|-----|---------------------------------------------------------------------------------------------------|------------------------------------------------------|-------|-----|-------|---------------------------|
| Segura, 1989[18]          | Spain        | Yes | No  | Inpatients with effusion                                                                          | NS                                                   | NS    | MP  | 100%  | NS                        |
| Gourgoulianis, 1990[19]   | Greece       | NS  | NS  | NS                                                                                                | NS                                                   | NS    | MP  | 100%  | NS                        |
| Gupta, 1990[20]           | India        | Yes | No  | NS                                                                                                | NS                                                   | NS    | MP  | 100%  | NS                        |
| Banales, 1991[21]         | Canada       | Yes | No  | Inpatients with exudative effusion                                                                | NS                                                   | NS    | MP  | 100%  | Government (foreign)      |
| Lopez Jimenez, 1991[22]   | Spain        | Yes | No  | NS                                                                                                | NS                                                   | NS    | NS  | NS    | NS                        |
| Maartens, 1991[23]        | South Africa | Yes | No  | Adult patients undergoing pleural aspiration/biopsy, patients with malignancy having new effusion | Empyema fluid judged unsuitable for ADA estimation   | NS    | MP  | 100%  | NS                        |
| Hara, 1992[24]            | Japan        | Yes | No  | NS                                                                                                | NS                                                   | NS    | MP  | 100%  | NS                        |
| Kaur, 1992[25]            | India        | Yes | No  | Inpatients with effusion                                                                          | NS                                                   | NS    | CMP | 65.6% | Institutional, Government |
| Muranishi, 1992[26]       | Japan        | Yes | No  | Inpatients with effusion                                                                          | NS                                                   | NS    | CMP | 52.9% | NS                        |
| Nagaraja, 1992[27]        | India        | Yes | No  | NS                                                                                                | Empyema, coexistent TB and malignancy                | NS    | CMP | 66.7% | NS                        |
| Perez-Rodriguez, 1992[28] | Spain        | Yes | No  | NS                                                                                                | NS                                                   | NS    | NS  | NS    | NS                        |
| Prasad, 1992[29]          | India        | Yes | No  | Inpatients with effusion                                                                          | NS                                                   | NS    | MP  | 100%  | NS                        |
| Hsu, 1993[30]             | Taiwan       | Yes | Yes | Inpatients with effusion                                                                          | NS                                                   | NS    | MP  | 100%  | NS                        |
| Valdes, 1993[31]          | Spain        | Yes | No  | Inpatients with effusion                                                                          | No definite diagnosis                                | NS    | MP  | 100%  | NS                        |
| Aoki, 1994[32]            | Japan        | Yes | No  | NS                                                                                                | NS                                                   | NS    | MP  | 100%  | Corporate                 |
| Chiang, 1994[33]          | Taiwan       | No  | No  | NS                                                                                                | NS                                                   | NS    | MP  | 100%  | NS                        |
| De Olivera, 1994[34]      | Brazil       | Yes | No  | Patients undergoing pleural aspiration                                                            | Cardiac failure, small effusion                      | NS    | CMP | 48.1% | NS                        |
| Richter, 1994[35]         | Tanzania     | Yes | No  | Inpatients with effusion                                                                          | Cardiac failure, patients on anti-tubercular therapy | 49/75 | CMP | 75.0% | Professional association  |
| Burgess, 1995[36]         | South Africa | Yes | No  | Patients undergoing pleural aspiration                                                            | NS                                                   | NS    | CMP | 76.6% | NS                        |
| Querol, 1995[37]          | Spain        | Yes | No  | NS                                                                                                | NS                                                   | NS    | MP  | 100%  | NS                        |
| Valdes, 1995[38]          | Spain        | Yes | No  | Inpatients <=35 years with effusion                                                               | Empyema                                              | NS    | MP  | 100%  | NS                        |

|                            |              |     |     |                                   |                                                                           |       |     |       |               |
|----------------------------|--------------|-----|-----|-----------------------------------|---------------------------------------------------------------------------|-------|-----|-------|---------------|
| Orphanidou, 1996[39]       | Greece       | NS  | NS  | NS                                | NS                                                                        | NS    | MP  | 100%  | NS            |
| Valdes, 1996[40]           | Spain        | Yes | No  | Inpatients with effusion          | No definite diagnosis                                                     | None  | MP  | 100%  | NS            |
| Villena, 1996[41]          | Spain        | Yes | No  | NS                                | Empyema                                                                   | 7/49  | MP  | 100%  | Government    |
| Ogawa, 1997[42]            | Japan        | No  | No  | NS                                | No definite diagnosis                                                     | NS    | MP  | 100%  | NS            |
| Kuralay, 1998[43]          | Turkey       | NS  | No  | Inpatients with effusion          | NS                                                                        | NS    | MP  | 100%  | NS            |
| Ghelani, 1999[44]          | India        | Yes | No  | NS                                | Past history of tuberculosis                                              | 13/81 | CMP | 63.0% | NS            |
| Perez-Rodriguez, 1999[45]  | Spain        | Yes | No  | NS                                | NS                                                                        | NS    | CMP | 96.2% | NS            |
| Riantawan, 1999[46]        | Thailand     | Yes | No  | Inpatients with effusion          | NS                                                                        | 37/89 | MP  | 100%  | NS            |
| San Jose, 1999[47]         | Spain        | Yes | No  | Inpatients with effusion          | NS                                                                        | NS    | CMP | NS    | Government    |
| Gorguner, 2000[48]         | Turkey       | Yes | No  | NS                                | No definite diagnosis                                                     | NS    | MP  | 100%  | NS            |
| Prandaman, 2000[49]        | India        | Yes | No  | NS                                | NS                                                                        | NS    | CMP | NS    | Institutional |
| Villegas, 2000[50]         | Columbia     | Yes | No  | Age >18 years                     | NS                                                                        | NS    | CMP | 68.9% | NS            |
| Nagesh, 2001[51]           | India        | Yes | No  | Outpatients with effusion         | Known definite etiology for effusion, patients on anti-tubercular therapy | NS    | CMP | 60.0% | NS            |
| Reechaipichitkul, 2001[52] | Thailand     | Yes | No  | Exudative lymphocytic effusion    | Bleeding diathesis                                                        | NS    | CMP | 70.0% | Institutional |
| Sharma, 2001[53]           | India        | Yes | No  | Outpatients with effusion         | NS                                                                        | NS    | CMP | 21.3% | NS            |
| Yamada, 2001[54]           | Japan        | No  | No  | NS                                | NS                                                                        | NS    | MP  | 100%  | NS            |
| Andreasyan, 2002[55]       | Armenia      | Yes | No  | NS                                | NS                                                                        | NS    | CMP | NS    | NS            |
| Jimenez, 2002[56]          | Spain        | Yes | No  | NS                                | NS                                                                        | NS    | MP  | 100%  | NS            |
| Diacon, 2003[57]           | South Africa | Yes | No  | Exudative pleural effusion        | Immunocompromised or HIV seropositive patients                            | None  | MP  | 100%  | NS            |
| Lima, 2003[58]             | Brazil       | Yes | No  | Suspected tuberculous effusion    | Symptoms for <4 weeks                                                     | NS    | CMP | 62.5% | NS            |
| Porcel, 2003[59]           | Spain        | No  | Yes | Tuberculous or malignant effusion | NS                                                                        | NS    | CMP | 45.3% | NS            |
| Tahhan, 2003[60]           | Turkey       | Yes | No  | Exudative pleural effusion        | No definite diagnosis                                                     | NS    | MP  | 100%  | NS            |

|                       |           |     |     |                                                   |                                                                      |       |     |       |               |
|-----------------------|-----------|-----|-----|---------------------------------------------------|----------------------------------------------------------------------|-------|-----|-------|---------------|
| Chen, 2004[61]        | Hong Kong | No  | No  | Inpatients with effusion                          | Non-Chinese patients, no definite diagnosis, hemothorax, transudates | NS    | CMP | NS    | NS            |
| Ghanei, 2004[62]      | Iran      | Yes | No  | NS                                                | NS                                                                   | NS    | MP  | 100%  | NS            |
| Poyraz, 2004[63]      | Turkey    | Yes | No  | Inpatients with effusion                          | NS                                                                   | NS    | P   | 100%  | NS            |
| Gaga, 2005[64]        | Greece    | Yes | Yes | NS                                                | NS                                                                   | None  | CMP | 94.4% | NS            |
| Gao, 2005[65]         | China     | Yes | No  | NS                                                | NS                                                                   | NS    | CMP | NS    | NS            |
| Moon, 2005[66]        | Korea     | Yes | No  | Suspected tuberculous effusion in >18 years age   | NS                                                                   | NS    | CMP | 71.9% | Institutional |
| Okamoto, 2005[67]     | Japan     | No  | Yes | Exudative lymphocytic effusion                    | Diagnosis other than TB or malignancy, or not definite               | NS    | MP  | 100%  | NS            |
| Sharma, 2005[68]      | India     | Yes | No  | NS                                                | Immunosuppressive therapy, pregnancy, major organ dysfunction        | None  | MP  | 100%  | NS            |
| Tozkoparan, 2005[69]  | Turkey    | NS  | Yes | NS                                                | NS                                                                   | NS    | MP  | 100%  | NS            |
| Celik, 2006[70]       | Turkey    | NS  | No  | Exudative pleural effusion                        | NS                                                                   | NS    | MP  | 100%  | NS            |
| Mishra, 2006[71]      | India     | Yes | No  | Children <14 years                                | NS                                                                   | NS    | CMP | 35.0% | NS            |
| Morimoto, 2006[72]    | Japan     | NS  | No  | NS                                                | NS                                                                   | NS    | CMP | NS    | NS            |
| Antonangelo, 2007[73] | Brazil    | Yes | Yes | Outpatients with effusion due to TB or malignancy | NS                                                                   | NS    | CMP | 37.4% | NS            |
| Ariga, 2007[74]       | Japan     | Yes | No  | Inpatients with effusion                          | No definite diagnosis                                                | None  | CMP | 100%  | Government    |
| Cok, 2007[75]         | Turkey    | NS  | Yes | Tuberculous or malignant pleural effusion         | Diabetes, chronic renal failure, chronic liver disease               | NS    | CMP | 75.0% | NS            |
| Daniil, 2007[76]      | Greece    | Yes | No  | NS                                                | NS                                                                   | NS    | MP  | 100%  | NS            |
| Lamsal, 2007[77]      | Nepal     | Yes | No  | NS                                                | NS                                                                   | NS    | CMP | 13.8% | Institutional |
| Moon, 2007[78]        | Korea     | Yes | No  | Suspected tuberculous effusion in >18 years age   | NS                                                                   | NS    | CMP | 53.8% | Institutional |
| Neves, 2007[79]       | Brazil    | Yes | No  | NS                                                | No definite diagnosis                                                | NS    | MP  | 100%  | NS            |
| Trajman, 2007[80]     | Brazil    | No  | No  | Inpatients with effusion                          | Anti-TB drugs for >7 days, no definite diagnosis                     | 12/88 | CMP | 77.9% | Government    |

|                         |              |     |     |                                                       |                                                                                                      |         |     |        |               |
|-------------------------|--------------|-----|-----|-------------------------------------------------------|------------------------------------------------------------------------------------------------------|---------|-----|--------|---------------|
| Xue, 2007[81]           | China        | Yes | Yes | Tuberculous or malignant pleural effusion             | NS                                                                                                   | NS      | MP  | 100%   | NS            |
| Baba, 2008[82]          | South Africa | No  | No  | Effusions for which pleural fluid ADA was estimated   | NS                                                                                                   | 140/165 | CMP | 36.5%  | NS            |
| Bandyopadhyay, 2008[83] | India        | Yes | Yes | Randomly selected patients with pleural effusion      | NS                                                                                                   | NS      | CMP | 14.7%  | NS            |
| Krenke, 2008[84]        | Poland       | Yes | No  | Inpatients with effusion                              | No definite diagnosis                                                                                | NS      | MP  | 100%   | NS            |
| Verma, 2008[85]         | India        | Yes | No  | NS                                                    | NS                                                                                                   | NS      | CMP | 82.9%  | NS            |
| Zaric, 2008[86]         | Serbia       | Yes | Yes | Tuberculous or malignant effusion, >18 years age      | Empyema, transudate, no definite diagnosis                                                           | NS      | MP  | 100%   | NS            |
| Chang, 2009[87]         | Korea        | Yes | No  | Inpatients with effusion                              | Transudates, pleural fluid leukocyte count not done                                                  | NS      | CMP | 79.6%  | NS            |
| Dheda, 2009[88]         | South Africa | Yes | No  | Suspected tuberculous effusion in >18 years age       | Pregnant women, incomplete patient or sample data                                                    | 20/51   | CMP | 87.3%  | NS            |
| Kupeli, 2009[89]        | Turkey       | Yes | No  | Inpatients with effusion                              | No definite diagnosis                                                                                | NS      | CMP | 38.9%  | NS            |
| Valdes, 2009[90]        | Spain        | Yes | No  | Tuberculous, malignant or para-pneumonic effusion     | NS                                                                                                   | NS      | MP  | 100%   | NS            |
| Zemlin, 2009[91]        | South Africa | No  | No  | NS                                                    | Patients taking antitubercular treatment                                                             | NS      | CMP | 53.2%  | NS            |
| Ciledag, 2010[92]       | Turkey       | NS  | No  | NS                                                    | NS                                                                                                   | NS      | MP  | 100%   | NS            |
| Gupta, 2010[93]         | India        | Yes | No  | Inpatients with effusion                              | NS                                                                                                   | NS      | CMP | 16.1%  | NS            |
| Katiyar, 2010[94]       | India        | Yes | No  | Exudative pleural effusion                            | Age <18 years, pregnancy, history of anti-TB therapy, on immunosuppressive therapy, HIV seropositive | None    | CMP | 73.1%  | NS            |
| Pandit, 2010[95]        | India        | Yes | No  | NS                                                    | NS                                                                                                   | NS      | CMP | 90.9%  | NS            |
| Porcel, 2010[96]        | Spain        | No  | No  | Pleural fluids for which ADA estimation was performed | NS                                                                                                   | 13/221  | CMP | 36.2%% | NS            |
| Song, 2010[97]          | New Zealand  | No  | No  | Exudative pleural effusion                            | NS                                                                                                   | NS      | MP  | 100%   | NS            |
| Valdes, 2010[98]        | Spain        | Yes | No  | Inpatients with effusion                              | NS                                                                                                   | NS      | MP  | 100%   | NS            |
| Wu, 2010[99]            | Taiwan       | No  | No  | NS                                                    | No definite diagnosis                                                                                | NS      | CMP | 91.3%  | Institutional |

|                            |          |     |     |                                                                                     |                                                 |      |     |       |                          |
|----------------------------|----------|-----|-----|-------------------------------------------------------------------------------------|-------------------------------------------------|------|-----|-------|--------------------------|
| Ambade, 2011[100]          | India    | Yes | No  | Inpatients with effusion                                                            | Subjects with incomplete data                   | NS   | MP  | 100%  | NS                       |
| Bhutia, 2011[101]          | India    | Yes | No  | Outpatients with effusion                                                           | Age <13 years                                   | NS   | CMP | NS    | NS                       |
| Kalantri, 2011[102]        | India    | Yes | No  | NS                                                                                  | NS                                              | NS   | CMP | 32.5% | Government               |
| Liu, 2011[103]             | Taiwan   | Yes | No  | Exudative and lymphocytic pleural effusion                                          | NS                                              | NS   | MP  | 100%  | Institutional            |
| Ogata, 2011[104]           | Japan    | No  | No  | NS                                                                                  | NS                                              | NS   | MP  | 100%  | Government               |
| Yildiz, 2011[105]          | Turkey   | No  | No  | Tuberculous or malignant pleural effusion                                           | Transudates, diagnosis other than TB/malignancy | NS   | CMP | >94%  | NS                       |
| Antonangelo, 2012[106]     | Brazil   | No  | Yes | HIV seronegative patients with lymphocytic effusion due to tuberculosis or lymphoma | NS                                              | None | CMP | NS    | NS                       |
| Cirak, 2012[107]           | Turkey   | Yes | No  | Inpatients with effusion                                                            | NS                                              | NS   | MP  | 100%  | NS                       |
| Demirer, 2012[108]         | Turkey   | Yes | No  | Effusion of indeterminate etiology in >18 years age                                 | No definite diagnosis                           | NS   | MP  | 100%  | NS                       |
| Devkota, 2012[109]         | Nepal    | Yes | No  | Inpatients with effusion                                                            | NS                                              | NS   | CMP | 0.0%  | NS                       |
| Garcia-Zamalloa, 2012[110] | Spain    | No  | No  | NS                                                                                  | NS                                              | NS   | CMP | 34.2% | NS                       |
| Kashiwabara, 2012[111]     | Japan    | No  | No  | Exudative pleural effusion                                                          | NS                                              | NS   | CMP | 23.8% | NS                       |
| Kumar, 2012[112]           | India    | Yes | No  | Exudative and lymphocytic pleural effusion                                          | NS                                              | NS   | CMP | 40.0% | NS                       |
| Pal, 2012[113]             | India    | No  | No  | NS                                                                                  | NS                                              | NS   | CMP | NS    | NS                       |
| Wang, 2012[114]            | China    | Yes | No  | NS                                                                                  | NS                                              | NS   | CMP | 85.9% | NS                       |
| Kelam, 2013[115]           | India    | Yes | No  | NS                                                                                  | NS                                              | NS   | CMP | 82.1% | NS                       |
| Keng, 2013[116]            | Taiwan   | Yes | No  | Exudative and lymphocytic pleural effusion                                          | NS                                              | 1/88 | CMP | 83.9% | Government               |
| Khan, 2013[117]            | Qatar    | Yes | No  | Inpatients with effusion                                                            | NS                                              | None | MP  | 100%  | Professional association |
| Khow-Ean, 2013[118]        | Thailand | No  | No  | Age >15 years undergoing pleural biopsy                                             | NS                                              | NS   | P   | 100%  | NS                       |
| Lee, 2013[119]             | Korea    | Yes | No  | NS                                                                                  | No definite diagnosis                           | NS   | MP  | 100%  | Institutional            |
| Sahn, 2013[120]            | Spain    | No  | Yes | NS                                                                                  | No definite diagnosis                           | None | MP  | 100%  | NS                       |

|                          |              |     |     |                                                                                        |                                                                                                                        |       |     |       |                          |
|--------------------------|--------------|-----|-----|----------------------------------------------------------------------------------------|------------------------------------------------------------------------------------------------------------------------|-------|-----|-------|--------------------------|
| Tay, 2013[121]           | Singapore    | No  | Yes | NS                                                                                     | NS                                                                                                                     | NS    | MP  | 100%  | NS                       |
| Wu, 2013[122]            | China        | Yes | Yes | Inpatients with effusion                                                               | No definite diagnosis, chest trauma, prior invasive pleural intervention, receiving anti-TB or immunosuppressive drugs | None  | CMP | 80.0% | NS                       |
| Abrao, 2014[123]         | Brazil       | No  | No  | Inpatients with effusion with age >18 years                                            | Prior treatment                                                                                                        | NS    | CMP | 55.7% | NS                       |
| Anwar, 2014[124]         | Pakistan     | Yes | No  | Age >12 years                                                                          | Enteric fever, viral hepatitis or active cirrhosis in past                                                             | NS    | CMP | NS    | NS                       |
| Kong, 2014[125]          | China        | No  | No  | Patient undergoing diagnostic medical thoracoscopy                                     | Incomplete histopathologic or clinical data                                                                            | NS    | MP  | 100%  | Professional association |
| Li, 2014[126]            | China        | NS  | Yes | Inpatients with effusion                                                               | NS                                                                                                                     | NS    | MP  | 100%  | NS                       |
| Liao, 2014[127]          | China        | Yes | No  | NS                                                                                     | NS                                                                                                                     | None  | MP  | 100%  | Professional association |
| Mehta, 2014[128]         | India        | Yes | No  | Exudative pleural effusion                                                             | Post-traumatic pleural effusion                                                                                        | NS    | CMP | 32.7% | NS                       |
| Meldau, 2014[129]        | South Africa | Yes | No  | Clinically suspected pleural tuberculosis                                              | Incomplete clinical data, on anti-TB drugs for >48 hours                                                               | 11/65 | MP  | 100%  | Professional association |
| Rahim, 2014[130]         | Pakistan     | Yes | Yes | Clinically suspected pleural tuberculosis, or transudative pleural effusion (controls) | NS                                                                                                                     | NS    | CMP | NS    | NS                       |
| Reis, 2014[131]          | Portugal     | No  | No  | Inpatients with effusion of unknown etiology                                           | NS                                                                                                                     | NS    | CMP | NS    | NS                       |
| Sanchez-Otero, 2014[132] | Spain        | NS  | NS  | NS                                                                                     | NS                                                                                                                     | NS    | NS  | NS    | NS                       |
| Sethi, 2014[133]         | India        | Yes | No  | NS                                                                                     | NS                                                                                                                     | NS    | CMP | 33.7% | Government               |
| Trajman, 2014[134]       | Brazil       | Yes | No  | Inpatients >18 years age with pleural effusion                                         | Bleeding diathesis, inadequate fluid volume, no definite diagnosis                                                     | 5/35  | CMP | 53.8% | NS                       |
| Valdes, 2014[135]        | Spain        | Yes | No  | Inpatients with effusion                                                               | No definite diagnosis                                                                                                  | NS    | MP  | 100%  | NS                       |
| Yurt, 2014[136]          | Turkey       | Yes | No  | Inpatients with effusion                                                               | No definite diagnosis, transudates, patients on anti-TB drugs, HIV seropositivity                                      | NS    | MP  | 100%  | None                     |

|                        |            |     |     |                                                                                   |                                                                                                       |       |     |       |                          |
|------------------------|------------|-----|-----|-----------------------------------------------------------------------------------|-------------------------------------------------------------------------------------------------------|-------|-----|-------|--------------------------|
| Agha, 2015[137]        | Egypt      | No  | Yes | Inpatients with effusion                                                          | Hepatic or renal impairment, presence of pleural thickening, diagnosis from thoracoscopy              | NS    | P   | 100%  | NS                       |
| Ali, 2015[138]         | Egypt      | Yes | Yes | Tuberculous or malignant pleural effusion                                         | Patients on anti-TB or immunosuppressive drugs                                                        | NS    | MP  | 100%  | NS                       |
| Arnold, 2015[139]      | UK         | Yes | No  | Undiagnosed pleural effusion                                                      | NS                                                                                                    | None  | CMP | 85.7% | NS                       |
| Behrsin, 2015[140]     | Brazil     | Yes | No  | NS                                                                                | Hemolysis in pleural fluids, no definite diagnosis, renal failure or immunodeficiency disease         | None  | MP  | 100%  | NS                       |
| Farhana, 2015[141]     | Bangladesh | Yes | No  | Inpatients with effusion                                                          | Hemothorax, empyema, patients on anti-TB drugs                                                        | NS    | CMP | 67.5% | NS                       |
| He, 2015[142]          | China      | Yes | No  | Patients undergoing thoracoscopy                                                  | No definite diagnosis, absence of follow-up data                                                      | NS    | MP  | 100%  | Government               |
| Klimiuk, 2015[143]     | Poland     | Yes | No  | NS                                                                                | No definite diagnosis, lack of consent for thoracentesis                                              | NS    | CMP | NS    | NS                       |
| Kosar, 2015[144]       | Turkey     | Yes | No  | Inpatients with effusion                                                          | NS                                                                                                    | NS    | MP  | 100%  | NS                       |
| Kumar, 2015[145]       | India      | Yes | No  | Patients with advanced renal failure and pleural effusion undergoing thoracoscopy | Minimal pleural effusion, parapneumonic effusion, coagulopathy, patients not willing for thoracoscopy | None  | MP  | 100%  | NS                       |
| Li, 2015[146]          | China      | Yes | No  | Inpatients with effusion                                                          | NS                                                                                                    | None  | CMP | 71.9% | Professional association |
| Saiphoklang, 2015[147] | Thailand   | No  | Yes | Tuberculous or malignant effusion, age >15 years                                  | NS                                                                                                    | 5/120 | CMP | 31.9% | Institutional            |
| Shu, 2015[148]         | Taiwan     | Yes | No  | Exudative and lymphocytic pleural effusion                                        | HIV co-infection                                                                                      | NS    | MP  | 100%  | Professional association |
| Skouras, 2015[149]     | Greece     | No  | No  | Banked fluids from exudative pleural effusion                                     | No definite diagnosis, transudates, hemothorax,                                                       | NS    | CMP | 80.0% | Professional association |
| Tural Onur, 2015[150]  | Turkey     | Yes | No  | Inpatients with exudative pleural effusion                                        | NS                                                                                                    | NS    | MP  | 100%  | NS                       |
| Yoshino, 2015[151]     | Japan      | Yes | No  | Infective pleurisy, age >18 years                                                 | Respiratory malignancy, rheumatoid arthritis                                                          | NS    | CMP | NS    | NS                       |
| Biswas, 2016[152]      | India      | Yes | No  | Inpatients with effusion                                                          | Transudates, empyema                                                                                  | NS    | NS  | NS    | None                     |



|                         |          |     |     |                                                                                     |                                                                                |       |     |       |                          |
|-------------------------|----------|-----|-----|-------------------------------------------------------------------------------------|--------------------------------------------------------------------------------|-------|-----|-------|--------------------------|
| Coral-Gudino, 2016[153] | Spain    | No  | Yes | Complicated tuberculous or parapneumonic effusion                                   | Empyema                                                                        | NS    | CMP | 40.1% | NS                       |
| Kim, 2016[154]          | Korea    | Yes | No  | Inpatients with unilateral effusion suspected to be due to TB                       | No definite diagnosis                                                          | 2/69  | CMP | 81.8% | Government               |
| Lee, 2016[155]          | Korea    | No  | Yes | Loculated neutrophilic pleural effusion due to TB or pneumonia                      | Empyema, no definite diagnosis                                                 | NS    | MP  | 100%  | NS                       |
| Liu, 2016[156]          | China    | Yes | Yes | Tuberculous or malignant effusion, age >12 years                                    | Coexistent TB and malignancy                                                   | None  | CMP | 40.7% | Professional association |
| Mallik, 2016[157]       | India    | NS  | No  | NS                                                                                  | NS                                                                             | NS    | CMP | NS    | None                     |
| Michot, 2016[158]       | France   | No  | No  | Adults with newly diagnosed pleural effusion and at least one ADA measurement       | Empyema                                                                        | 5/104 | CMP | 61.8% | NS                       |
| Rahman, 2016[159]       | India    | No  | No  | Inpatients with effusion                                                            | NS                                                                             | NS    | CMP | NS    | None                     |
| Saiphoklang, 2016[160]  | Thailand | Yes | No  | Age >=15 years                                                                      | NS                                                                             | NS    | CMP | 44.8% | Institutional            |
| Suleman, 2016[161]      | Pakistan | Yes | No  | Lymphocytic exudative pleural effusion                                              | NS                                                                             | NS    | P   | 100%  | NS                       |
| Che, 2017[162]          | China    | Yes | No  | Clinically suspected pleural tuberculosis                                           | Incomplete clinical or outcome data                                            | 1/78  | CMP | 53.3% | Government               |
| Chung, 2017[163]        | Korea    | Yes | No  | Inpatients with effusion                                                            | Poor sample condition (such as clotting)                                       | NS    | CMP | 84.0% | Institutional            |
| El Hoshy, 2017[164]     | Egypt    | No  | Yes | Inpatients with effusion                                                            | NS                                                                             | NS    | M   | 100%  | NS                       |
| Kim, 2017[165]          | Korea    | No  | Yes | Confirmed diagnosis of pleural effusion due to tuberculosis or Mycoplasma infection | Non-lymphocytic pleural effusion                                               | NS    | MP  | 100%  | Government               |
| Sivakumar, 2017[166]    | UK       | No  | Yes | Adults with pleural effusion having ADA measurement                                 | Suspected but unconfirmed pleural tuberculosis                                 | None  | MP  | 100%  | NS                       |
| Xu, 2017[167]           | China    | Yes | No  | Adults with unilateral pleural effusion                                             | Immunosuppression, history of anti-tubercular therapy or previous tuberculosis | None  | CMP | 42.2% | Government               |
| Zhang, 2017[168]        | China    | Yes | No  | Adult inpatients with clinically suspected pleural tuberculosis                     | HIV co-infection, previous treatment for tuberculosis,                         | None  | MP  | 100%  | NS                       |

|                      |             |     |    |                                                       |                                     |       |     |       |            | transudative effusion, no definite diagnosis |  |
|----------------------|-------------|-----|----|-------------------------------------------------------|-------------------------------------|-------|-----|-------|------------|----------------------------------------------|--|
| Blakiston, 2018[169] | New Zealand | No  | No | Adults with pleural effusion having ADA measurement   | NS                                  | NS    | CMP | 87.7% | NS         |                                              |  |
| Chang, 2018[170]     | Hong Kong   | No  | No | Exudative pleural effusion having ADA measurement     | NS                                  | NS    | CMP | 72.0% | NS         |                                              |  |
| He, 2018[171]        | China       | Yes | No | Inpatients with undiagnosed pleural effusion          | NS                                  | NS    | CMP | 81.6% | Government |                                              |  |
| Hong, 2018[172]      | Korea       | Yes | No | Adults with pleural effusion                          | Hemothorax, parapneumonic effusion, | NS    | CMP | 63.8% | Government |                                              |  |
| Santos, 2018[173]    | Brazil      | Yes | No | Adults undergoing diagnostic thoracentesis            | Pregnant women                      | 4/147 | CMP | 48.5% | NS         |                                              |  |
| Wang, 2018[174]      | China       | Yes | No | Inpatients with pleural effusion of definite etiology | NS                                  | NS    | MP  | 100%  | Government |                                              |  |

HIV+ Human immunodeficiency virus seropositivity, NS Not specified, TB Tuberculosis

Standard for diagnosis: C Clinical, M Microbiologic, P Pathologic

\* Definite TB implies microbiologic and/or histopathologic confirmation of diagnosis in patients with tuberculous pleural effusion

See Table S1 for detailed bibliography
