# Supplementary material for: Adenosine deaminase for diagnosis of tuberculous pleural effusion: A systematic review and meta-analysis
Source: PubMed Central journal article supplement (PMC6435228; doi:10.1371/journal.pone.0213728), 2019-03-26
Supplement: pone.0213728.s007.pdf [file pone.0213728.s007.pdf]

**S3 Table.** Clinical characteristics, and adenosine deaminase assay technique and results, from studies included in data synthesis.

| Author, year            | Patient number |        | Etiology of non-tubercular effusions |                            |            | Assay method | Cut-off (IU/L) | TP  | FN | TN  | FP |
|-------------------------|----------------|--------|--------------------------------------|----------------------------|------------|--------------|----------------|-----|----|-----|----|
|                         | TB             | Others | Malignant                            | Empyema /<br>parapneumonic | Transudate |              |                |     |    |     |    |
| Piras, 1978[1]          | 21             | 33     | Yes                                  | Yes                        | No         | Guisti       | 30             | 21  | 0  | 33  | 0  |
| Blake, 1982[2]          | 82             | 120    | Yes                                  | Yes                        | Yes        | non-Guisti   | 30             | 74  | 8  | 118 | 2  |
| Maritz, 1982[3]         | 107            | 237    | Yes                                  | Yes                        | Yes        | Guisti       | 40             | 100 | 7  | 188 | 49 |
| Petterson, 1984[4]      | 19             | 72     | Yes                                  | Yes                        | Yes        | Guisti       | 50             | 19  | 0  | 62  | 10 |
| Niwa, 1985[5]           | 30             | 28     | Yes                                  | No                         | No         | NS           | 30             | 26  | 4  | 22  | 6  |
| Raj, 1985[6]            | 30             | 25     | Yes                                  | Yes                        | Yes        | Guisti       | 40             | 30  | 0  | 24  | 1  |
| Sinha, 1987[7]          | 37             | 16     | Yes                                  | Yes                        | Yes        | Guisti       | 30             | 37  | 0  | 16  | 0  |
| Strankinga, 1987[8]     | 10             | 69     | Yes                                  | Yes                        | Yes        | Guisti       | 53             | 10  | 0  | 60  | 9  |
| Teo, 1987[9]            | 25             | 67     | Yes                                  | Yes                        | Yes        | Guisti       | 50             | 24  | 1  | 61  | 6  |
| van Keimpema, 1987[10]  | 5              | 93     | Yes                                  | Yes                        | Yes        | non-Guisti   | 44             | 4   | 1  | 85  | 8  |
| Fontan Bueso, 1988[11]  | 61             | 77     | Yes                                  | Yes                        | Yes        | Guisti       | 33             | 61  | 0  | 68  | 9  |
| Kao, 1988[12]           | 18             | 41     | Yes                                  | Yes                        | Yes        | non-Guisti   | 60             | 18  | 0  | 36  | 5  |
| Kim, 1988[13]           | 28             | 22     | Yes                                  | No                         | No         | Guisti       | 41             | 25  | 3  | 19  | 3  |
| Tamura, 1988[14]        | 8              | 44     | Yes                                  | Yes                        | Yes        | non-Guisti   | 40             | 6   | 2  | 42  | 2  |
| Gilhotra, 1989[15]      | 30             | 43     | Yes                                  | Yes                        | Yes        | Guisti       | 40             | 30  | 0  | 39  | 4  |
| Hsu, 1989[16]           | 19             | 20     | Yes                                  | Yes                        | No         | Guisti       | 50             | 18  | 1  | 18  | 2  |
| Moriwaki, 1989[17]      | 14             | 37     | Yes                                  | No                         | No         | non-Guisti   | 33             | 14  | 0  | 35  | 2  |
| Segura, 1989[18]        | 170            | 430    | Yes                                  | Yes                        | Yes        | Guisti       | 42.6           | 170 | 0  | 395 | 35 |
| Gourgoulianis, 1990[19] | 37             | 83     | Yes                                  | Yes                        | No         | Guisti       | 38             | 37  | 0  | 81  | 2  |
| Gupta, 1990[20]         | 36             | 17     | Yes                                  | Yes                        | No         | Guisti       | 50.75          | 36  | 0  | 16  | 1  |
| Banales, 1991[21]       | 82             | 136    | Yes                                  | Yes                        | No         | Guisti       | 70             | 81  | 1  | 130 | 6  |
| Lopez Jimenez, 1991[22] | 32             | 125    | Yes                                  | Yes                        | Yes        | non-Guisti   | 32             | 28  | 4  | 114 | 11 |
| Maartens, 1991[23]      | 61             | 48     | Yes                                  | No                         | Yes        | NS           | 45             | 47  | 14 | 40  | 8  |

|                           |     |     |     |     |     |            |                 |                |             |                |             |
|---------------------------|-----|-----|-----|-----|-----|------------|-----------------|----------------|-------------|----------------|-------------|
| Hara, 1992[24]            | 26  | 36  | Yes | Yes | No  | NS         | 50              | 18             | 8           | 35             | 1           |
| Kaur, 1992[25]            | 32  | 52  | Yes | Yes | Yes | Guisti     | 30              | 16             | 16          | 48             | 4           |
| Muranishi, 1992[26]       | 34  | 33  | Yes | Yes | Yes | Guisti     | 50              | 16             | 18          | 25             | 8           |
| Nagaraja, 1992[27]        | 15  | 15  | Yes | Yes | Yes | Guisti     | 50              | 15             | 0           | 15             | 0           |
| Perez-Rodriguez, 1992[28] | 17  | 84  | Yes | Yes | Yes | non-Guisti | 40              | 15             | 2           | 83             | 1           |
| Prasad, 1992[29]          | 21  | 26  | Yes | Yes | Yes | non-Guisti | 30              | 21             | 0           | 26             | 0           |
| Hsu, 1993[30]             | 30  | 30  | Yes | No  | No  | Guisti     | 60<br>80<br>100 | 24<br>24<br>22 | 6<br>6<br>8 | 26<br>27<br>27 | 4<br>3<br>3 |
| Valdes, 1993[31]          | 91  | 314 | Yes | Yes | Yes | Guisti     | 47              | 91             | 0           | 298            | 16          |
| Aoki, 1994[32]            | 11  | 28  | Yes | Yes | Yes | non-Guisti | 45              | 9              | 2           | 25             | 3           |
| Chiang, 1994[33]          | 27  | 66  | Yes | Yes | Yes | Guisti     | 60              | 23             | 4           | 63             | 3           |
| De Olivera, 1994[34]      | 54  | 222 | Yes | Yes | Yes | Guisti     | 40              | 51             | 3           | 191            | 31          |
| Richter, 1994[35]         | 112 | 6   | Yes | Yes | No  | NS         | 10              | 109            | 3           | 3              | 3           |
| Burgess, 1995[36]         | 154 | 289 | Yes | Yes | Yes | Guisti     | 50              | 139            | 15          | 257            | 32          |
| Querol, 1995[37]          | 21  | 86  | Yes | Yes | Yes | non-Guisti | 45              | 18             | 3           | 84             | 2           |
| Valdes, 1995[38]          | 81  | 48  | Yes | Yes | No  | Guisti     | 47              | 81             | 0           | 42             | 6           |
| Orphanidou, 1996[39]      | 33  | 64  | Yes | Yes | Yes | Guisti     | 40.6            | 26             | 7           | 60             | 4           |
| Valdes, 1996[40]          | 76  | 274 | Yes | Yes | Yes | Guisti     | 47              | 76             | 0           | 249            | 25          |
| Villena, 1996[41]         | 49  | 179 | Yes | Yes | Yes | non-Guisti | 33              | 44             | 5           | 170            | 9           |
| Ogawa, 1997[42]           | 16  | 25  | Yes | Yes | No  | NS         | 33              | 15             | 1           | 20             | 5           |
| Kuralay, 1998[43]         | 30  | 59  | Yes | Yes | Yes | non-Guisti | 30              | 24             | 6           | 52             | 7           |
| Ghelani, 1999[44]         | 54  | 27  | Yes | Yes | Yes | Guisti     | 40              | 41             | 13          | 16             | 11          |
| Perez-Rodriguez, 1999[45] | 27  | 76  | Yes | Yes | Yes | non-Guisti | 40              | 24             | 3           | 70             | 6           |
| Riantawan, 1999[46]       | 100 | 116 | Yes | Yes | Yes | Guisti     | 60              | 95             | 5           | 97             | 19          |
| San Jose, 1999[47]        | 23  | 117 | Yes | Yes | Yes | Guisti     | 54              | 23             | 0           | 113            | 4           |
| Gorguner, 2000[48]        | 36  | 51  | Yes | Yes | Yes | Guisti     | 47              | 32             | 4           | 46             | 5           |

|                            |     |     |     |     |     |            |                |                |             |                |             |
|----------------------------|-----|-----|-----|-----|-----|------------|----------------|----------------|-------------|----------------|-------------|
| Prandaman, 2000[49]        | 25  | 12  | Yes | No  | Yes | Guisti     | 47.3           | 19             | 6           | 7              | 5           |
| Villegas, 2000[50]         | 61  | 70  | Yes | Yes | Yes | Guisti     | 45.5           | 53             | 8           | 60             | 10          |
| Nagesh, 2001[51]           | 20  | 40  | Yes | No  | Yes | Guisti     | 50             | 11             | 9           | 22             | 18          |
| Reechaipichitkul, 2001[52] | 50  | 82  | Yes | No  | No  | Guisti     | 48             | 40             | 10          | 66             | 16          |
| Sharma, 2001[53]           | 48  | 27  | Yes | No  | Yes | Guisti     | 35<br>100      | 40<br>19       | 8<br>29     | 18<br>27       | 9<br>0      |
| Yamada, 2001[54]           | 21  | 42  | Yes | Yes | No  | non-Guisti | 45             | 18             | 3           | 37             | 5           |
| Andreasyan, 2002[55]       | 47  | 22  | Yes | Yes | No  | non-Guisti | 20             | 45             | 2           | 20             | 2           |
| Jimenez, 2002[56]          | 16  | 68  | Yes | Yes | No  | NS         | 40             | 14             | 2           | 66             | 2           |
| Diacon, 2003[57]           | 39  | 10  | Yes | No  | No  | Guisti     | 50             | 37             | 2           | 9              | 1           |
| Lima, 2003[58]             | 16  | 29  | Yes | No  | No  | Guisti     | 40             | 11             | 5           | 21             | 8           |
| Porcel, 2003[59]           | 104 | 272 | Yes | No  | No  | non-Guisti | 40             | 97             | 7           | 259            | 13          |
| Tahhan, 2003[60]           | 24  | 38  | Yes | Yes | No  | Guisti     | 40             | 22             | 2           | 34             | 4           |
| Chen, 2004[61]             | 63  | 147 | Yes | Yes | No  | non-Guisti | 55.8           | 55             | 8           | 135            | 12          |
| Ghanei, 2004[62]           | 17  | 71  | Yes | Yes | Yes | Guisti     | 47             | 9              | 8           | 69             | 2           |
| Poyraz, 2004[63]           | 15  | 30  | Yes | No  | Yes | Guisti     | 45             | 13             | 2           | 30             | 0           |
| Gaga, 2005[64]             | 36  | 34  | Yes | No  | No  | Guisti     | 50             | 35             | 1           | 33             | 1           |
| Gao, 2005[65]              | 141 | 49  | Yes | No  | No  | non-Guisti | 40.3           | 116            | 25          | 43             | 6           |
| Moon, 2005[66]             | 57  | 54  | Yes | Yes | No  | Guisti     | 45             | 46             | 11          | 51             | 3           |
| Okamoto, 2005[67]          | 11  | 32  | Yes | No  | No  | non-Guisti | 32             | 11             | 0           | 31             | 1           |
| Sharma, 2005[68]           | 35  | 17  | Yes | No  | No  | Guisti     | 33             | 32             | 3           | 17             | 0           |
| Tozkoparan, 2005[69]       | 26  | 29  | Yes | Yes | Yes | NS         | 50             | 24             | 2           | 27             | 2           |
| Celik, 2006[70]            | 17  | 28  | Yes | Yes | No  | Guisti     | 35.55          | 17             | 0           | 28             | 0           |
| Mishra, 2006[71]           | 20  | 11  | Yes | Yes | No  | Guisti     | 38             | 16             | 4           | 7              | 4           |
| Morimoto, 2006[72]         | 19  | 46  | Yes | Yes | Yes | non-Guisti | 50<br>57<br>58 | 15<br>15<br>14 | 4<br>4<br>5 | 44<br>45<br>45 | 2<br>1<br>1 |
| Antonangelo, 2007[73]      | 182 | 144 | Yes | No  | No  | Guisti     | 40             | 182            | 0           | 131            | 13          |

|                         |     |     |     |     |     |            |                |                  |             |                   |                |
|-------------------------|-----|-----|-----|-----|-----|------------|----------------|------------------|-------------|-------------------|----------------|
| Ariga, 2007[74]         | 27  | 47  | Yes | Yes | Yes | NS         | 40.7           | 22               | 5           | 43                | 4              |
| Cok, 2007[75]           | 16  | 19  | Yes | No  | No  | Guisti     | 40             | 12               | 4           | 19                | 0              |
| Daniil, 2007[76]        | 12  | 60  | Yes | Yes | No  | Guisti     | 45             | 9                | 3           | 47                | 13             |
| Lamsal, 2007[77]        | 29  | 13  | Yes | Yes | No  | Guisti     | 45             | 22               | 7           | 13                | 0              |
| Moon, 2007[78]          | 26  | 27  | Yes | Yes | No  | Guisti     | 45             | 25               | 1           | 19                | 8              |
| Neves, 2007[79]         | 104 | 111 | Yes | Yes | Yes | Guisti     | 39             | 99               | 5           | 92                | 19             |
| Trajman, 2007[80]       | 84  | 27  | Yes | Yes | Yes | Guisti     | 36.6           | 76               | 8           | 26                | 1              |
| Xue, 2007[81]           | 45  | 42  | Yes | No  | No  | non-Guisti | 40             | 36               | 9           | 37                | 5              |
| Baba, 2008[82]          | 197 | 40  | Yes | Yes | Yes | Guisti     | 30             | 186              | 11          | 38                | 2              |
| Bandyopadhyay, 2008[83] | 34  | 15  | NS  | NS  | NS  | Guisti     | 30             | 20               | 14          | 9                 | 6              |
| Krenke, 2008[84]        | 28  | 66  | Yes | Yes | Yes | Guisti     | 40.3           | 28               | 0           | 62                | 4              |
| Verma, 2008[85]         | 41  | 9   | Yes | No  | No  | Guisti     | 36             | 41               | 0           | 7                 | 2              |
| Zaric, 2008[86]         | 54  | 67  | Yes | No  | No  | Guisti     | 49             | 48               | 6           | 47                | 20             |
| Chang, 2009[87]         | 108 | 280 | Yes | Yes | No  | NS         | 40<br>48<br>50 | 102<br>100<br>99 | 6<br>8<br>9 | 245<br>255<br>255 | 35<br>25<br>25 |
| Dheda, 2009[88]         | 55  | 19  | Yes | Yes | No  | Guisti     | 13<br>30<br>47 | 55<br>52<br>49   | 0<br>3<br>6 | 7<br>13<br>13     | 12<br>6<br>6   |
| Kupeli, 2009[89]        | 18  | 69  | Yes | Yes | Yes | non-Guisti | 40             | 14               | 4           | 63                | 6              |
| Valdes, 2009[90]        | 39  | 57  | Yes | Yes | No  | Guisti     | 54.3           | 38               | 1           | 53                | 4              |
| Zemlin, 2009[91]        | 365 | 514 | Yes | Yes | Yes | Guisti     | 52.4           | 342              | 23          | 456               | 58             |
| Ciledag, 2010[92]       | 14  | 56  | Yes | Yes | Yes | NS         | 41.5           | 11               | 3           | 48                | 8              |
| Gupta, 2010[93]         | 56  | 40  | Yes | Yes | No  | non-Guisti | 40             | 56               | 0           | 39                | 1              |
| Katiyar, 2010[94]       | 52  | 50  | Yes | Yes | No  | NS         | 38             | 47               | 5           | 43                | 7              |
| Pandit, 2010[95]        | 22  | 50  | Yes | No  | No  | Guisti     | 40<br>70       | 22<br>13         | 0<br>9      | 27<br>50          | 23<br>0        |
| Porcel, 2010[96]        | 59  | 496 | Yes | Yes | Yes | Guisti     | 35             | 55               | 4           | 449               | 47             |

|                            |     |     |     |     |     |            |                      |                          |                     |                      |                     |
|----------------------------|-----|-----|-----|-----|-----|------------|----------------------|--------------------------|---------------------|----------------------|---------------------|
| Song, 2010[97]             | 5   | 115 | Yes | Yes | No  | Guisti     | 30<br>70             | 5<br>4                   | 0<br>1              | 99<br>107            | 16<br>8             |
| Valdes, 2010[98]           | 165 | 53  | Yes | Yes | No  | Guisti     | 35                   | 165                      | 0                   | 42                   | 11                  |
| Wu, 2010[99]               | 23  | 56  | Yes | Yes | Yes | non-Guisti | 19.5                 | 22                       | 1                   | 45                   | 11                  |
| Ambade, 2011[100]          | 48  | 33  | Yes | No  | No  | Guisti     | 71                   | 38                       | 10                  | 25                   | 8                   |
| Bhutia, 2011[101]          | 35  | 19  | Yes | No  | Yes | Guisti     | 40                   | 33                       | 2                   | 17                   | 2                   |
| Kalantri, 2011[102]        | 154 | 50  | Yes | Yes | Yes | Guisti     | 44.75                | 122                      | 32                  | 46                   | 4                   |
| Liu, 2011[103]             | 24  | 42  | Yes | No  | No  | Guisti     | 30                   | 17                       | 7                   | 40                   | 2                   |
| Ogata, 2011[104]           | 124 | 311 | Yes | Yes | Yes | NS         | 36                   | 106                      | 18                  | 265                  | 46                  |
| Yildiz, 2011[105]          | 114 | 82  | Yes | No  | No  | Guisti     | 31<br>55             | 114<br>99                | 0<br>15             | 36<br>71             | 46<br>11            |
| Antonangelo, 2012[106]     | 130 | 29  | Yes | No  | No  | Guisti     | 40                   | 130                      | 0                   | 20                   | 9                   |
| Cirak, 2012[107]           | 23  | 77  | Yes | Yes | Yes | Guisti     | 40                   | 19                       | 4                   | 74                   | 3                   |
| Demirer, 2012[108]         | 157 | 91  | Yes | Yes | Yes | NS         | 30<br>35<br>38<br>46 | 148<br>132<br>126<br>113 | 9<br>25<br>31<br>44 | 59<br>66<br>72<br>84 | 32<br>25<br>19<br>7 |
| Devkota, 2012[109]         | 65  | 29  | Yes | Yes | Yes | NS         | 40<br>42.19<br>70    | 59<br>59<br>41           | 6<br>6<br>24        | 22<br>24<br>24       | 7<br>5<br>5         |
| Garcia-Zamalloa, 2012[110] | 73  | 399 | Yes | Yes | Yes | non-Guisti | 40                   | 65                       | 8                   | 370                  | 29                  |
| Kashwabara, 2012[111]      | 21  | 126 | Yes | Yes | No  | non-Guisti | 50                   | 18                       | 3                   | 100                  | 26                  |
| Kumar, 2012[112]           | 67  | 16  | Yes | Yes | No  | non-Guisti | 40                   | 67                       | 0                   | 14                   | 2                   |
| Pal, 2012[113]             | 70  | 180 | NS  | NS  | NS  | Guisti     | 60                   | 70                       | 0                   | 180                  | 0                   |
| Wang, 2012[114]            | 78  | 44  | Yes | Yes | Yes | Guisti     | 40                   | 73                       | 5                   | 40                   | 4                   |
| Kelam, 2013[115]           | 39  | 18  | Yes | Yes | No  | Guisti     | 40                   | 35                       | 4                   | 9                    | 9                   |
| Keng, 2013[116]            | 31  | 57  | NS  | NS  | NS  | Guisti     | 15.5<br>40           | 26<br>14                 | 5<br>17             | 50<br>56             | 7<br>1              |
| Khan, 2013[117]            | 72  | 31  | Yes | Yes | No  | Guisti     | 16.65<br>58.6        | 62<br>13                 | 10<br>59            | 23<br>31             | 8<br>0              |

|                          |     |     |     |     |     |            |                    |               |             |                |             |
|--------------------------|-----|-----|-----|-----|-----|------------|--------------------|---------------|-------------|----------------|-------------|
| Khaw-Ean, 2013[118]      | 18  | 30  | Yes | No  | No  | Guisti     | 17.5<br>24<br>40.5 | 16<br>14<br>9 | 2<br>4<br>9 | 22<br>24<br>30 | 8<br>6<br>0 |
| Lee, 2013[119]           | 60  | 160 | Yes | Yes | Yes | Guisti     | 28                 | 53            | 7           | 147            | 13          |
| Sahn, 2013[120]          | 548 | 423 | Yes | Yes | Yes | Guisti     | 44                 | 535           | 13          | 394            | 29          |
| Tay, 2013[121]           | 80  | 80  | Yes | Yes | No  | Guisti     | 45                 | 75            | 5           | 66             | 14          |
| Wu, 2013[122]            | 40  | 41  | Yes | Yes | Yes | Guisti     | 24.5               | 35            | 5           | 35             | 6           |
| Abrao, 2014[123]         | 174 | 135 | Yes | Yes | No  | Guisti     | 29                 | 157           | 17          | 115            | 20          |
| Anwar, 2014[124]         | 164 | 56  | Yes | Yes | Yes | Guisti     | 40                 | 161           | 3           | 53             | 3           |
| Kong, 2014[125]          | 76  | 15  | Yes | No  | No  | NS         | 40                 | 62            | 14          | 9              | 6           |
| Li, 2014[126]            | 47  | 43  | Yes | No  | No  | non-Guisti | 39                 | 36            | 11          | 36             | 7           |
| Liao, 2014[127]          | 281 | 51  | Yes | Yes | Yes | Guisti     | 35                 | 156           | 125         | 44             | 7           |
| Mehta, 2014[128]         | 49  | 73  | Yes | Yes | No  | NS         | 40                 | 43            | 6           | 59             | 14          |
| Meldau, 2014[129]        | 43  | 41  | Yes | Yes | Yes | Guisti     | 30<br>48.85        | 32<br>23      | 11<br>20    | 38<br>39       | 3<br>2      |
| Rahim, 2014[130]         | 60  | 20  | No  | No  | Yes | NS         | 40                 | 33            | 27          | 19             | 1           |
| Reis, 2014[131]          | 20  | 87  | Yes | Yes | No  | Guisti     | 40.5               | 19            | 1           | 80             | 7           |
| Sanchez-Otero, 2014[132] | 30  | 108 | Yes | Yes | No  | Guisti     | 40                 | 29            | 1           | 97             | 11          |
| Sethi, 2014[133]         | 92  | 14  | Yes | Yes | No  | Guisti     | 52.4               | 67            | 25          | 10             | 4           |
| Trajman, 2014[134]       | 39  | 23  | Yes | No  | Yes | NS         | 40                 | 35            | 4           | 20             | 3           |
| Valdes, 2014[135]        | 70  | 361 | Yes | Yes | Yes | non-Guisti | 56                 | 69            | 1           | 337            | 24          |
| Yurt, 2014[136]          | 43  | 50  | Yes | Yes | No  | Guisti     | 40.68              | 38            | 5           | 44             | 6           |
| Agha, 2015[137]          | 30  | 25  | Yes | No  | Yes | NS         | 30.49              | 29            | 1           | 21             | 4           |
| Ali, 2015[138]           | 20  | 20  | Yes | No  | No  | Guisti     | 35.5               | 17            | 3           | 17             | 3           |
| Arnold, 2015[139]        | 7   | 331 | Yes | Yes | Yes | non-Guisti | 35                 | 6             | 1           | 301            | 30          |
| Behrsin, 2015[140]       | 122 | 96  | Yes | Yes | Yes | Guisti     | 40                 | 98            | 24          | 83             | 13          |
| Farhana, 2015[141]       | 40  | 24  | Yes | Yes | No  | NS         | 40                 | 38            | 2           | 20             | 4           |
| He, 2015[142]            | 56  | 80  | Yes | Yes | No  | non-Guisti | 30                 | 45            | 11          | 74             | 6           |

|                         |     |     |     |     |     |            |                |                |             |                |                |
|-------------------------|-----|-----|-----|-----|-----|------------|----------------|----------------|-------------|----------------|----------------|
| Klimiuk, 2015[143]      | 43  | 153 | Yes | Yes | Yes | NS         | 40             | 38             | 5           | 142            | 11             |
| Kosar, 2015[144]        | 50  | 51  | Yes | Yes | No  | Guisti     | 42             | 44             | 6           | 35             | 16             |
| Kumar, 2015[145]        | 6   | 20  | No  | No  | No  | Guisti     | 40             | 4              | 2           | 18             | 2              |
| Li, 2015[146]           | 32  | 55  | Yes | Yes | Yes | non-Guisti | 10.25          | 28             | 4           | 48             | 7              |
| Saiphoklang, 2015[147]  | 47  | 73  | Yes | No  | No  | NS         | 30             | 40             | 7           | 71             | 2              |
| Shu, 2015[148]          | 35  | 60  | Yes | Yes | No  | Guisti     | 40             | 14             | 21          | 59             | 1              |
| Skouras, 2015[149]      | 10  | 111 | Yes | Yes | No  | Guisti     | 31             | 9              | 1           | 89             | 22             |
| Tural Onur, 2015[150]   | 52  | 68  | Yes | Yes | No  | Guisti     | 62.44          | 44             | 8           | 55             | 13             |
| Yoshino, 2015[151]      | 10  | 17  | No  | Yes | No  | NS         | 51.9           | 9              | 1           | 11             | 6              |
| Biswas, 2016[152]       | 9   | 42  | Yes | No  | No  | NS         | 40             | 7              | 2           | 40             | 2              |
| Coral-Gudino, 2016[153] | 135 | 266 | No  | Yes | No  | non-Guisti | 40             | 133            | 2           | 139            | 127            |
| Kim, 2016[154]          | 26  | 28  | Yes | Yes | Yes | NS         | 32<br>40       | 21<br>20       | 5<br>5      | 22<br>22       | 6<br>6         |
| Lee, 2016[155]          | 10  | 54  | No  | Yes | No  | non-Guisti | 45.2           | 10             | 0           | 42             | 8              |
| Liu, 2016[156]          | 91  | 26  | Yes | No  | No  | NS         | 15.35          | 86             | 5           | 25             | 1              |
| Mallik, 2016[157]       | 68  | 32  | Yes | Yes | Yes | Guisti     | 40             | 66             | 2           | 31             | 1              |
| Michot, 2016[158]       | 34  | 70  | Yes | Yes | Yes | Guisti     | 41.5           | 33             | 1           | 65             | 5              |
| Rahman, 2016[159]       | 84  | 16  | Yes | NS  | No  | Guisti     | 50             | 84             | 0           | 14             | 2              |
| Saiphoklang, 2016[160]  | 29  | 149 | Yes | Yes | Yes | Guisti     | 33.5           | 27             | 2           | 141            | 8              |
| Suleman, 2016[161]      | 99  | 61  | Yes | Yes | No  | Guisti     | 40             | 88             | 11          | 47             | 14             |
| Che, 2017[162]          | 60  | 18  | Yes | Yes | Yes | NS         | 40             | 41             | 19          | 16             | 2              |
| Chung, 2017[163]        | 106 | 230 | Yes | Yes | Yes | Guisti     | 46.1           | 93             | 13          | 217            | 13             |
| El Hoshy, 2017[164]     | 20  | 40  | Yes | Yes | No  | non-Guisti | 45             | 15             | 5           | 30             | 10             |
| Kim, 2017[165]          | 275 | 8   | No  | Yes | No  | NS         | 53             | 231            | 44          | 6              | 2              |
| Sivakumar, 2017[166]    | 27  | 105 | Yes | Yes | Yes | non-Guisti | 30<br>35<br>40 | 26<br>24<br>23 | 1<br>3<br>4 | 88<br>90<br>93 | 17<br>15<br>12 |
| Xu, 2017[167]           | 97  | 80  | Yes | Yes | No  | Guisti     | 45             | 60             | 37          | 76             | 4              |

|                      |     |      |     |     |     |            |          |          |        |             |            |
|----------------------|-----|------|-----|-----|-----|------------|----------|----------|--------|-------------|------------|
| Zhang, 2017[168]     | 354 | 84   | Yes | Yes | No  | non-Guisti | 40       | 354      | 0      | 64          | 20         |
| Blakiston, 2018[169] | 57  | 1580 | Yes | Yes | Yes | non-Guisti | 15<br>30 | 57<br>53 | 0<br>4 | 991<br>1379 | 589<br>201 |
| Chang, 2018[170]     | 152 | 474  | Yes | Yes | No  | non-Guisti | 27.5     | 134      | 18     | 416         | 58         |
| He, 2018[171]        | 49  | 60   | Yes | Yes | Yes | non-Guisti | 13.45    | 37       | 12     | 56          | 4          |
| Hong, 2018[172]      | 47  | 28   | Yes | Yes | Yes | non-Guisti | 40<br>70 | 46<br>38 | 1<br>9 | 27<br>28    | 1<br>0     |
| Santos, 2018[173]    | 33  | 46   | Yes | Yes | Yes | Guisti     | 40       | 27       | 6      | 44          | 2          |
| Wang, 2018[174]      | 95  | 179  | Yes | Yes | No  | non-Guisti | 21.4     | 84       | 11     | 155         | 24         |

FN False negative, FP False positive, HIV+ Human immunodeficiency virus seropositivity, NS Not specified, TN True negative, TP True positive  
See Table S1 for detailed bibliography
