# Supplementary material for: Adenosine deaminase for diagnosis of tuberculous pleural effusion: A systematic review and meta-analysis
Source: PubMed Central journal article supplement (PMC6435228; doi:10.1371/journal.pone.0213728), 2019-03-26
Supplement: pone.0213728.s008.pdf [file pone.0213728.s008.pdf]

**S4 Table.** Diagnostic accuracy estimates from included studies

| <b>Author, year</b>     | <b>Sensitivity</b> | <b>Specificity</b> | <b>Positive likelihood ratio</b> | <b>Negative likelihood ratio</b> | <b>Diagnostic odds ratio</b> |
|-------------------------|--------------------|--------------------|----------------------------------|----------------------------------|------------------------------|
| Piras, 1978[1]          | 1.00 (0.84-1.00)   | 1.00 (0.89-1.00)   | 66.45 (4.24-1041.7)              | 0.02 (0.00-0.36)                 | 2881.00 (55.08-150702)       |
| Blake, 1982[2]          | 0.90 (0.82-0.96)   | 0.98 (0.94-1.00)   | 54.15 (13.67-214.4)              | 0.10 (0.05-0.19)                 | 545.75 (112.8-2640.36)       |
| Maritz, 1982[3]         | 0.93 (0.87-0.97)   | 0.79 (0.74-0.84)   | 4.52 (3.51-5.83)                 | 0.08 (0.04-0.17)                 | 54.81 (23.94-125.48)         |
| Petterson, 1984[4]      | 1.00 (0.82-1.00)   | 0.86 (0.76-0.93)   | 6.78 (3.86-11.92)                | 0.03 (0.00-0.45)                 | 232.14 (13.00-4144.68)       |
| Niwa, 1985[5]           | 0.87 (0.69-0.96)   | 0.79 (0.59-0.92)   | 4.04 (1.96-8.33)                 | 0.17 (0.07-0.43)                 | 23.83 (5.96-95.37)           |
| Raj, 1985[6]            | 1.00 (0.88-1.00)   | 0.96 (0.80-1.00)   | 17.05 (3.60-80.68)               | 0.02 (0.00-0.27)                 | 996.33 (38.85-25554.3)       |
| Sinha, 1987[7]          | 1.00 (0.91-1.00)   | 1.00 (0.79-1.00)   | 33.55 (2.19-514.97)              | 0.01 (0.00-0.21)                 | 2475.00 (47.07-130152)       |
| Strankinga, 1987[8]     | 1.00 (0.69-1.00)   | 0.87 (0.77-0.94)   | 7.03 (3.84-12.88)                | 0.05 (0.00-0.79)                 | 133.74 (7.23-2475.51)        |
| Teo, 1987[9]            | 0.96 (0.80-1.00)   | 0.91 (0.82-0.97)   | 10.72 (4.98-23.1)                | 0.04 (0.01-0.30)                 | 244.00 (27.89-2134.97)       |
| van Keimpema, 1987[10]  | 0.80 (0.28-0.99)   | 0.91 (0.84-0.96)   | 9.30 (4.20-20.58)                | 0.22 (0.04-1.26)                 | 42.50 (4.23-427.34)          |
| Fontan Bueso, 1988[11]  | 1.00 (0.94-1.00)   | 0.88 (0.79-0.95)   | 8.14 (4.49-14.79)                | 0.01 (0.00-0.15)                 | 886.89 (50.56-15557.6)       |
| Kao, 1988[12]           | 1.00 (0.81-1.00)   | 0.88 (0.74-0.96)   | 7.44 (3.40-16.26)                | 0.03 (0.00-0.47)                 | 245.55 (12.87-4684.83)       |
| Kim, 1988[13]           | 0.89 (0.72-0.98)   | 0.86 (0.65-0.97)   | 6.55 (2.27-18.89)                | 0.12 (0.04-0.37)                 | 52.78 (9.57-291.18)          |
| Tamura, 1988[14]        | 0.75 (0.35-0.97)   | 0.95 (0.85-0.99)   | 16.50 (4.02-67.71)               | 0.26 (0.08-0.87)                 | 63.00 (7.42-534.66)          |
| Gilhotra, 1989[15]      | 1.00 (0.88-1.00)   | 0.91 (0.78-0.97)   | 9.62 (4.23-11.00)                | 0.02 (0.00-0.28)                 | 535.44 (27.75-10329.8)       |
| Hsu, 1989[16]           | 0.95 (0.74-1.00)   | 0.90 (0.68-0.99)   | 9.47 (2.53-35.43)                | 0.06 (0.01-0.40)                 | 162.00 (13.46-1949.58)       |
| Moriwaki, 1989[17]      | 1.00 (0.77-1.00)   | 0.95 (0.82-0.99)   | 14.69 (4.42-48.87)               | 0.04 (0.00-0.55)                 | 411.80 (18.6-9115.54)        |
| Segura, 1989[18]        | 1.00 (0.98-1.00)   | 0.92 (0.89-0.94)   | 12.11 (8.83-16.59)               | 0.00 (0.00-0.05)                 | 3799.03 (231.71-62288)       |
| Gourgoulianis, 1990[19] | 1.00 (0.91-1.00)   | 0.98 (0.92-1.00)   | 33.16 (9.77-112.49)              | 0.01 (0.00-0.21)                 | 2445.00 (114.54-52193)       |
| Gupta, 1990[20]         | 1.00 (0.90-1.00)   | 0.94 (0.71-1.00)   | 11.84 (2.56-54.81)               | 0.01 (0.00-0.23)                 | 803.00 (31.04-20771.7)       |
| Banales, 1991[21]       | 0.99 (0.93-1.00)   | 0.96 (0.91-0.98)   | 22.39 (10.24-48.97)              | 0.01 (0.00-0.09)                 | 1755.00 (207.5-14843.7)      |
| Lopez Jimenez, 1991[22] | 0.88 (0.71-0.96)   | 0.91 (0.85-0.96)   | 9.94 (5.57-17.75)                | 0.14 (0.05-0.34)                 | 72.55 (21.49-244.93)         |
| Maartens, 1991[23]      | 0.77 (0.65-0.87)   | 0.83 (0.70-0.93)   | 4.62 (2.42-8.83)                 | 0.28 (0.17-0.44)                 | 16.79 (6.39-44.08)           |
| Hara, 1992[24]          | 0.69 (0.48-0.86)   | 0.97 (0.85-1.00)   | 24.92 (3.55-175.08)              | 0.32 (0.18-0.56)                 | 78.75 (9.13-679.57)          |

|                           |                  |                  |                     |                  |                         |
|---------------------------|------------------|------------------|---------------------|------------------|-------------------------|
| Kaur, 1992[25]            | 0.50 (0.32-0.68) | 0.92 (0.81-0.98) | 6.50 (2.38-17.73)   | 0.54 (0.38-0.77) | 12.00 (3.50-41.18)      |
| Muranishi, 1992[26]       | 0.47 (0.30-0.65) | 0.76 (0.58-0.89) | 1.94 (0.96-3.91)    | 0.70 (0.48-1.01) | 2.78 (0.98-7.88)        |
| Nagaraja, 1992[27]        | 1.00 (0.78-1.00) | 1.00 (0.78-1.00) | 31.00 (2.02-475.12) | 0.03 (0.00-0.49) | 961.00 (17.91-51566.4)  |
| Perez-Rodriguez, 1992[28] | 0.88 (0.64-0.99) | 0.99 (0.94-1.00) | 74.12 (10.48-524.1) | 0.12 (0.03-0.44) | 622.50 (53.04-7305.47)  |
| Prasad, 1992[29]          | 1.00 (0.84-1.00) | 1.00 (0.87-1.00) | 52.77 (3.38-822.84) | 0.02 (0.00-0.36) | 2279.00 (43.40-119669)  |
| Hsu, 1993[30]             | 0.80 (0.61-0.92) | 0.90 (0.73-0.98) | 8.00 (2.69-23.75)   | 0.22 (0.11-0.46) | 36.00 (8.11-159.89)     |
| Valdes, 1993[31]          | 1.00 (0.96-1.00) | 0.95 (0.92-0.97) | 18.99 (11.87-30.38) | 0.01 (0.00-0.09) | 3310.64 (196.7-55721.3) |
| Aoki, 1994[32]            | 0.82 (0.48-0.98) | 0.89 (0.72-0.98) | 7.64 (2.53-23.05)   | 0.20 (0.06-0.72) | 37.50 (5.36-262.17)     |
| Chiang, 1994[33]          | 0.85 (0.66-0.96) | 0.95 (0.87-0.99) | 18.74 (6.13-57.25)  | 0.16 (0.06-0.38) | 120.75 (25.09-581.13)   |
| De Olivera, 1994[34]      | 0.94 (0.85-0.99) | 0.86 (0.81-0.9)  | 6.76 (4.85-9.43)    | 0.06 (0.02-0.19) | 104.74 (30.78-356.44)   |
| Richter, 1994[35]         | 0.97 (0.92-0.99) | 0.50 (0.12-0.88) | 1.95 (0.87-4.34)    | 0.05 (0.01-0.21) | 36.33 (5.07-260.26)     |
| Burgess, 1995[36]         | 0.90 (0.84-0.94) | 0.89 (0.85-0.92) | 8.15 (5.86-11.35)   | 0.11 (0.07-0.18) | 74.42 (38.97-142.15)    |
| Querol, 1995[37]          | 0.86 (0.64-0.97) | 0.98 (0.92-1.00) | 36.86 (9.27-146.62) | 0.15 (0.05-0.42) | 252.00 (39.22-1619.11)  |
| Valdes, 1995[38]          | 1.00 (0.96-1.00) | 0.88 (0.75-0.95) | 7.49 (3.66-15.33)   | 0.01 (0.00-0.11) | 1065.77 (58.63-19374.3) |
| Orphanidou, 1996[39]      | 0.79 (0.61-0.91) | 0.94 (0.85-0.98) | 12.61 (4.80-33.10)  | 0.23 (0.12-0.44) | 55.71 (15.01-206.87)    |
| Valdes, 1996[40]          | 1.00 (0.95-1.00) | 0.91 (0.87-0.94) | 10.71 (7.40-15.51)  | 0.01 (0.00-0.11) | 1497.00 (90.08-24878.6) |
| Villena, 1996[41]         | 0.90 (0.78-0.97) | 0.95 (0.91-0.98) | 17.86 (9.38-33.99)  | 0.11 (0.05-0.25) | 166.22 (53.03-520.97)   |
| Ogawa, 1997[42]           | 0.94 (0.70-1.00) | 0.80 (0.59-0.93) | 4.69 (2.12-10.37)   | 0.08 (0.01-0.53) | 60.00 (6.33-568.69)     |
| Kuralay, 1998[43]         | 0.80 (0.61-0.92) | 0.88 (0.77-0.95) | 6.74 (3.29-13.83)   | 0.23 (0.11-0.47) | 29.71 (9.01-97.95)      |
| Ghelani, 1999[44]         | 0.76 (0.62-0.87) | 0.59 (0.39-0.78) | 1.86 (1.15-3.01)    | 0.41 (0.23-0.72) | 4.59 (1.71-12.34)       |
| Perez-Rodriguez, 1999[45] | 0.89 (0.71-0.98) | 0.92 (0.84-0.97) | 11.26 (5.16-24.55)  | 0.12 (0.04-0.35) | 93.33 (21.65-402.45)    |
| Riantawan, 1999[46]       | 0.95 (0.89-0.98) | 0.84 (0.76-0.90) | 5.80 (3.84-8.77)    | 0.06 (0.03-0.14) | 97.00 (34.81-270.33)    |
| San Jose, 1999[47]        | 1.00 (0.85-1.00) | 0.97 (0.91-0.99) | 25.68 (10.36-63.66) | 0.02 (0.00-0.34) | 1185.44 (61.72-22769.7) |
| Gorguner, 2000[48]        | 0.89 (0.74-0.97) | 0.90 (0.79-0.97) | 9.07 (3.91-21.01)   | 0.12 (0.05-0.31) | 73.60 (18.33-295.5)     |
| Prandaman, 2000[49]       | 0.76 (0.55-0.91) | 0.58 (0.28-0.85) | 1.82 (0.90-3.69)    | 0.41 (0.18-0.96) | 4.43 (1.02-19.27)       |
| Villegas, 2000[50]        | 0.87 (0.76-0.94) | 0.86 (0.75-0.93) | 6.08 (3.40-10.88)   | 0.15 (0.08-0.29) | 39.75 (14.62-108.1)     |

|                            |                  |                  |                     |                  |                         |
|----------------------------|------------------|------------------|---------------------|------------------|-------------------------|
| Nagesh, 2001[51]           | 0.55 (0.32-0.77) | 0.55 (0.38-0.71) | 1.22 (0.72-2.06)    | 0.82 (0.47-1.43) | 1.49 (0.51-4.39)        |
| Reechaipichitkul, 2001[52] | 0.80 (0.66-0.90) | 0.80 (0.70-0.88) | 4.10 (2.59-6.5)     | 0.25 (0.14-0.44) | 16.50 (6.83-39.87)      |
| Sharma, 2001[53]           | 0.83 (0.70-0.93) | 0.67 (0.46-0.83) | 2.50 (1.44-4.33)    | 0.25 (0.13-0.50) | 10.00 (3.32-30.13)      |
| Yamada, 2001[54]           | 0.86 (0.64-0.97) | 0.88 (0.74-0.96) | 7.20 (3.11-16.69)   | 0.16 (0.06-0.47) | 44.40 (9.54-206.73)     |
| Andreasyan, 2002[55]       | 0.96 (0.85-0.99) | 0.91 (0.71-0.99) | 10.53 (2.81-39.54)  | 0.05 (0.01-0.18) | 225.00 (29.57-1712.32)  |
| Jimenez, 2002[56]          | 0.88 (0.62-0.98) | 0.97 (0.90-1.00) | 29.75 (7.50-118)    | 0.13 (0.04-0.47) | 231.00 (29.95-1781.96)  |
| Diacon, 2003[57]           | 0.95 (0.83-0.99) | 0.90 (0.55-1.00) | 9.49 (1.48-60.99)   | 0.06 (0.01-0.22) | 166.50 (13.55-2045.81)  |
| Lima, 2003[58]             | 0.69 (0.41-0.89) | 0.72 (0.53-0.87) | 2.49 (1.27-4.9)     | 0.43 (0.20-0.92) | 5.78 (1.52-21.93)       |
| Porcel, 2003[59]           | 0.93 (0.87-0.97) | 0.95 (0.92-0.97) | 19.51 (11.45-33.25) | 0.07 (0.03-0.14) | 276.08 (106.98-712.43)  |
| Tahhan, 2003[60]           | 0.92 (0.73-0.99) | 0.89 (0.75-0.97) | 8.71 (3.42-22.18)   | 0.09 (0.02-0.35) | 93.50 (15.77-554.49)    |
| Chen, 2004[61]             | 0.87 (0.77-0.94) | 0.92 (0.86-0.96) | 10.69 (6.17-18.54)  | 0.14 (0.07-0.26) | 77.34 (29.97-199.58)    |
| Ghanei, 2004[62]           | 0.53 (0.28-0.77) | 0.97 (0.90-1.00) | 18.79 (4.46-79.16)  | 0.48 (0.29-0.80) | 38.81 (7.10-212.05)     |
| Poyraz, 2004[63]           | 0.87 (0.60-0.98) | 1.00 (0.88-1.00) | 52.31 (3.32-824.41) | 0.16 (0.05-0.50) | 329.40 (14.79-7335.62)  |
| Gaga, 2005[64]             | 0.97 (0.85-1.00) | 0.97 (0.85-1.00) | 33.06 (4.79-228.13) | 0.03 (0.00-0.20) | 1155.00 (69.38-19228.8) |
| Gao, 2005[65]              | 0.82 (0.75-0.88) | 0.88 (0.75-0.95) | 6.72 (3.16-14.27)   | 0.20 (0.14-0.29) | 33.25 (12.77-86.61)     |
| Moon, 2005[66]             | 0.81 (0.68-0.90) | 0.94 (0.85-0.99) | 14.53 (4.80-43.95)  | 0.20 (0.12-0.35) | 71.09 (18.66-270.78)    |
| Okamoto, 2005[67]          | 1.00 (0.72-1.00) | 0.97 (0.84-1.00) | 21.08 (4.40-101.13) | 0.04 (0.00-0.66) | 483.00 (18.34-12721.9)  |
| Sharma, 2005[68]           | 0.91 (0.77-0.98) | 1.00 (0.80-1.00) | 32.50 (2.11-500.89) | 0.10 (0.04-0.27) | 325.00 (15.87-6657.23)  |
| Tozkoparan, 2005[69]       | 0.92 (0.75-0.99) | 0.93 (0.77-0.99) | 13.38 (3.50-51.21)  | 0.08 (0.02-0.31) | 162.00 (21.16-1240.45)  |
| Celik, 2006[70]            | 1.00 (0.80-1.00) | 1.00 (0.88-1.00) | 56.39 (3.61-881.12) | 0.03 (0.00-0.43) | 1995.00 (37.85-105162)  |
| Mishra, 2006[71]           | 0.80 (0.56-0.94) | 0.64 (0.31-0.89) | 2.20 (0.98-4.95)    | 0.31 (0.12-0.84) | 7.00 (1.35-36.31)       |
| Morimoto, 2006[72]         | 0.79 (0.54-0.94) | 0.98 (0.88-1.00) | 36.32 (5.15-255.87) | 0.22 (0.09-0.51) | 168.75 (17.47-1629.94)  |
| Antonangelo, 2007[73]      | 1.00 (0.98-1.00) | 0.91 (0.85-0.95) | 10.71 (6.44-17.8)   | 0.00 (0.00-0.05) | 3555.37 (209.49-60341)  |
| Ariga, 2007[74]            | 0.81 (0.62-0.94) | 0.91 (0.80-0.98) | 9.57 (3.69-24.87)   | 0.20 (0.09-0.45) | 47.30 (11.53-194.05)    |
| Cok, 2007[75]              | 0.75 (0.48-0.93) | 1.00 (0.82-1.00) | 29.41 (1.88-460.89) | 0.27 (0.12-0.60) | 108.33 (5.36-2190.80)   |
| Daniil, 2007[76]           | 0.75 (0.43-0.95) | 0.78 (0.66-0.88) | 3.46 (1.94-6.19)    | 0.32 (0.12-0.86) | 10.85 (2.56-45.95)      |

|                         |                  |                  |                     |                  |                         |
|-------------------------|------------------|------------------|---------------------|------------------|-------------------------|
| Lamsal, 2007[77]        | 0.76 (0.56-0.90) | 1.00 (0.75-1.00) | 21.00 (1.37-321.89) | 0.26 (0.14-0.49) | 81.00 (4.28-1533.96)    |
| Moon, 2007[78]          | 0.96 (0.80-1.00) | 0.70 (0.50-0.86) | 3.25 (1.81-5.83)    | 0.05 (0.01-0.38) | 59.38 (6.83-516.27)     |
| Neves, 2007[79]         | 0.95 (0.89-0.98) | 0.83 (0.75-0.89) | 5.56 (3.68-8.39)    | 0.06 (0.02-0.14) | 95.87 (34.39-267.26)    |
| Trajman, 2007[80]       | 0.90 (0.82-0.96) | 0.96 (0.81-1.00) | 24.43 (3.57-167.39) | 0.10 (0.05-0.19) | 247.00 (29.47-2070.20)  |
| Xue, 2007[81]           | 0.80 (0.65-0.90) | 0.88 (0.74-0.96) | 6.72 (2.91-15.5)    | 0.23 (0.13-0.41) | 29.60 (9.04-96.87)      |
| Baba, 2008[82]          | 0.94 (0.90-0.97) | 0.95 (0.83-0.99) | 18.88 (4.89-72.93)  | 0.06 (0.03-0.10) | 321.27 (68.43-1508.4)   |
| Bandyopadhyay, 2008[83] | 0.59 (0.41-0.75) | 0.60 (0.32-0.84) | 1.47 (0.74-2.9)     | 0.69 (0.39-1.22) | 2.14 (0.62-7.39)        |
| Krenke, 2008[84]        | 1.00 (0.88-1.00) | 0.94 (0.85-0.98) | 14.63 (5.99-35.76)  | 0.02 (0.00-0.29) | 791.67 (41.22-15203.4)  |
| Verma, 2008[85]         | 1.00 (0.91-1.00) | 0.78 (0.40-0.97) | 3.95 (1.35-11.57)   | 0.02 (0.00-0.26) | 249.00 (10.84-5720.55)  |
| Zaric, 2008[86]         | 0.89 (0.77-0.96) | 0.70 (0.58-0.81) | 2.98 (2.04-4.35)    | 0.16 (0.07-0.34) | 18.80 (6.94-50.95)      |
| Chang, 2009[87]         | 0.93 (0.86-0.97) | 0.91 (0.87-0.94) | 10.37 (7.11-15.13)  | 0.08 (0.04-0.16) | 127.50 (55.65-292.12)   |
| Dheda, 2009[88]         | 0.95 (0.85-0.99) | 0.68 (0.43-0.87) | 2.99 (1.54-5.82)    | 0.08 (0.03-0.25) | 37.56 (8.27-170.57)     |
| Kupeli, 2009[89]        | 0.78 (0.52-0.94) | 0.91 (0.82-0.97) | 8.94 (4.01-19.98)   | 0.24 (0.1-0.58)  | 36.75 (9.14-147.75)     |
| Valdes, 2009[90]        | 0.97 (0.87-1.00) | 0.93 (0.83-0.98) | 13.88 (5.39-35.77)  | 0.03 (0.00-0.19) | 503.50 (54.11-4685.10)  |
| Zemlin, 2009[91]        | 0.94 (0.91-0.96) | 0.89 (0.86-0.91) | 8.30 (6.51-10.6)    | 0.07 (0.05-0.11) | 116.91 (70.7-193.30)    |
| Ciledag, 2010[92]       | 0.79 (0.49-0.95) | 0.86 (0.74-0.94) | 5.50 (2.74-11.05)   | 0.25 (0.09-0.69) | 22.00 (5.01-96.63)      |
| Gupta, 2010[93]         | 1.00 (0.94-1.00) | 0.98 (0.87-1.00) | 27.09 (5.63-130.35) | 0.01 (0.00-0.14) | 2975.67 (118.14-74947)  |
| Katiyar, 2010[94]       | 0.90 (0.79-0.97) | 0.86 (0.73-0.94) | 6.46 (3.23-12.91)   | 0.11 (0.05-0.26) | 57.74 (17.05-195.57)    |
| Pandit, 2010[95]        | 0.59 (0.36-0.79) | 1.00 (0.93-1.00) | 59.87 (3.72-964.47) | 0.42 (0.26-0.68) | 143.53 (7.85-2625.55)   |
| Porcel, 2010[96]        | 0.93 (0.84-0.98) | 0.91 (0.88-0.93) | 9.84 (7.43-13.02)   | 0.07 (0.03-0.19) | 131.36 (45.58-378.59)   |
| Song, 2010[97]          | 1.00 (0.48-1.00) | 0.86 (0.78-0.92) | 6.44 (3.88-10.71)   | 0.10 (0.01-1.38) | 66.33 (3.5-1256.71)     |
| Valdes, 2010[98]        | 1.00 (0.98-1.00) | 0.79 (0.66-0.89) | 4.68 (2.80-7.82)    | 0.00 (0.00-0.06) | 1223.26 (70.66-21177.4) |
| Wu, 2010[99]            | 0.96 (0.78-1.00) | 0.80 (0.68-0.90) | 4.87 (2.85-8.33)    | 0.05 (0.01-0.37) | 90.00 (10.92-742.09)    |
| Ambade, 2011[100]       | 0.79 (0.65-0.90) | 0.76 (0.58-0.89) | 3.27 (1.76-6.07)    | 0.28 (0.15-0.49) | 11.88 (4.12-34.2)       |
| Bhutia, 2011[101]       | 0.94 (0.81-0.99) | 0.89 (0.67-0.99) | 8.96 (2.41-33.31)   | 0.06 (0.02-0.25) | 140.25 (18.14-1084.49)  |
| Kalantri, 2011[102]     | 0.79 (0.72-0.85) | 0.92 (0.81-0.98) | 9.90 (3.85-25.44)   | 0.23 (0.16-0.31) | 43.84 (14.69-130.84)    |

|                            |                  |                  |                     |                  |                        |
|----------------------------|------------------|------------------|---------------------|------------------|------------------------|
| Liu, 2011[103]             | 0.71 (0.49-0.87) | 0.95 (0.84-0.99) | 14.87 (3.75-58.93)  | 0.31 (0.16-0.57) | 48.57 (9.14-258.22)    |
| Ogata, 2011[104]           | 0.85 (0.78-0.91) | 0.85 (0.81-0.89) | 5.78 (4.38-7.62)    | 0.17 (0.11-0.26) | 33.93 (18.81-61.18)    |
| Yildiz, 2011[105]          | 0.87 (0.79-0.92) | 0.87 (0.77-0.93) | 6.47 (3.72-11.27)   | 0.15 (0.09-0.25) | 42.60 (18.47-98.24)    |
| Antonangelo, 2012[106]     | 1.00 (0.97-1.00) | 0.69 (0.49-0.85) | 3.15 (1.86-5.32)    | 0.01 (0.00-0.09) | 563.21 (31.56-10050.1) |
| Cirak, 2012[107]           | 0.83 (0.61-0.95) | 0.96 (0.89-0.99) | 21.20 (6.88-65.31)  | 0.18 (0.07-0.44) | 117.17 (24.14-568.58)  |
| Demirer, 2012[108]         | 0.72 (0.64-0.79) | 0.92 (0.85-0.97) | 9.36 (4.56-19.19)   | 0.30 (0.23-0.39) | 30.82 (13.22-71.82)    |
| Devkota, 2012[109]         | 0.91 (0.81-0.97) | 0.83 (0.64-0.94) | 5.26 (2.36-11.73)   | 0.11 (0.05-0.24) | 47.20 (13.15-169.45)   |
| Garcia-Zamalloa, 2012[110] | 0.89 (0.80-0.95) | 0.93 (0.90-0.95) | 12.25 (8.55-17.55)  | 0.12 (0.06-0.23) | 103.66 (45.39-236.76)  |
| Kashiwabara, 2012[111]     | 0.86 (0.64-0.97) | 0.79 (0.71-0.86) | 4.15 (2.83-6.100)   | 0.18 (0.06-0.52) | 23.08 (6.31-84.35)     |
| Kumar, 2012[112]           | 1.00 (0.95-1.00) | 0.88 (0.62-0.98) | 6.75 (2.15-21.21)   | 0.01 (0.00-0.14) | 783.00 (35.67-17189.2) |
| Pal, 2012[113]             | 1.00 (0.95-1.00) | 1.00 (0.98-1.00) | 359.45 (22.57-5725) | 0.01 (0.00-0.11) | 50901.0 (1000-2590130) |
| Wang, 2012[114]            | 0.94 (0.86-0.98) | 0.91 (0.78-0.97) | 10.29 (4.04-26.25)  | 0.07 (0.03-0.17) | 146.00 (37.09-574.65)  |
| Kelam, 2013[115]           | 0.90 (0.76-0.97) | 0.50 (0.26-0.74) | 1.79 (1.12-2.88)    | 0.21 (0.07-0.58) | 8.75 (2.19-35.02)      |
| Keng, 2013[116]            | 0.84 (0.66-0.95) | 0.88 (0.76-0.95) | 6.83 (3.36-13.9)    | 0.18 (0.08-0.41) | 37.14 (10.73-128.56)   |
| Khan, 2013[117]            | 0.86 (0.76-0.93) | 0.74 (0.55-0.88) | 3.34 (1.82-6.100)   | 0.19 (0.10-0.35) | 17.83 (6.27-50.71)     |
| Khow-Ean, 2013[118]        | 0.89 (0.65-0.99) | 0.73 (0.54-0.88) | 3.33 (1.80-6.17)    | 0.15 (0.04-0.57) | 22.00 (4.11-117.80)    |
| Lee, 2013[119]             | 0.88 (0.77-0.95) | 0.92 (0.87-0.96) | 10.87 (6.40-18.45)  | 0.13 (0.06-0.26) | 85.62 (32.42-226.08)   |
| Sahn, 2013[120]            | 0.98 (0.96-0.99) | 0.93 (0.90-0.95) | 14.24 (10.02-20.24) | 0.03 (0.01-0.04) | 559.12 (286.97-1089.4) |
| Tay, 2013[121]             | 0.94 (0.86-0.98) | 0.82 (0.72-0.90) | 5.36 (3.32-8.65)    | 0.08 (0.03-0.18) | 70.71 (24.17-206.85)   |
| Wu, 2013[122]              | 0.88 (0.73-0.96) | 0.85 (0.71-0.94) | 5.98 (2.83-12.64)   | 0.15 (0.06-0.34) | 40.83 (11.40-146.27)   |
| Abrao, 2014[123]           | 0.90 (0.85-0.94) | 0.85 (0.78-0.91) | 6.09 (4.05-9.15)    | 0.11 (0.07-0.18) | 53.10 (26.64-105.86)   |
| Anwar, 2014[124]           | 0.98 (0.95-1.00) | 0.95 (0.85-0.99) | 18.33 (6.09-55.11)  | 0.02 (0.01-0.06) | 948.11 (185.74-4839.6) |
| Kong, 2014[125]            | 0.82 (0.71-0.90) | 0.60 (0.32-0.84) | 2.04 (1.09-3.83)    | 0.31 (0.16-0.58) | 6.64 (2.03-21.72)      |
| Li, 2014[126]              | 0.77 (0.62-0.88) | 0.84 (0.69-0.93) | 4.71 (2.35-9.44)    | 0.28 (0.16-0.48) | 16.83 (5.86-48.3)      |
| Liao, 2014[127]            | 0.56 (0.49-0.61) | 0.86 (0.74-0.94) | 4.04 (2.02-8.11)    | 0.52 (0.43-0.61) | 7.84 (3.42-18.02)      |
| Mehta, 2014[128]           | 0.88 (0.75-0.95) | 0.81 (0.70-0.89) | 4.58 (2.82-7.41)    | 0.15 (0.07-0.32) | 30.20 (10.74-84.93)    |

|                          |                  |                  |                     |                  |                        |
|--------------------------|------------------|------------------|---------------------|------------------|------------------------|
| Meldau, 2014[129]        | 0.74 (0.59-0.86) | 0.93 (0.80-0.98) | 10.17 (3.37-30.66)  | 0.28 (0.16-0.46) | 36.85 (9.45-143.63)    |
| Rahim, 2014[130]         | 0.55 (0.42-0.68) | 0.95 (0.75-1.00) | 11.00 (1.61-75.33)  | 0.47 (0.35-0.64) | 23.22 (2.92-184.81)    |
| Reis, 2014[131]          | 0.95 (0.75-1.00) | 0.92 (0.84-0.97) | 11.81 (5.76-24.2)   | 0.05 (0.01-0.37) | 217.14 (25.19-1871.93) |
| Sanchez-Otero, 2014[132] | 0.97 (0.83-1.00) | 0.90 (0.83-0.95) | 9.49 (5.40-16.68)   | 0.04 (0.01-0.26) | 255.73 (31.67-2064.89) |
| Sethi, 2014[133]         | 0.73 (0.63-0.82) | 0.71 (0.42-0.92) | 2.55 (1.10-5.89)    | 0.38 (0.24-0.61) | 6.70 (1.92-23.32)      |
| Trajman, 2014[134]       | 0.90 (0.76-0.97) | 0.87 (0.66-0.97) | 6.88 (2.38-19.87)   | 0.12 (0.05-0.30) | 58.33 (11.84-287.36)   |
| Valdes, 2014[135]        | 0.99 (0.92-1.00) | 0.93 (0.90-0.96) | 14.83 (10.06-21.85) | 0.02 (0.00-0.11) | 968.88 (128.90-7282.4) |
| Yurt, 2014[136]          | 0.88 (0.75-0.96) | 0.88 (0.76-0.95) | 7.36 (3.45-15.72)   | 0.13 (0.06-0.30) | 55.73 (15.75-197.21)   |
| Agha, 2015[137]          | 0.97 (0.83-1.00) | 0.84 (0.64-0.95) | 6.04 (2.45-14.87)   | 0.04 (0.01-0.27) | 152.25 (15.85-1462.13) |
| Ali, 2015[138]           | 0.85 (0.62-0.97) | 0.85 (0.62-0.97) | 5.67 (1.96-16.35)   | 0.18 (0.06-0.51) | 32.11 (5.66-182.18)    |
| Arnold, 2015[139]        | 0.86 (0.42-1.00) | 0.91 (0.87-0.94) | 9.46 (5.99-14.92)   | 0.16 (0.03-0.96) | 60.20 (7.01-516.81)    |
| Behrsin, 2015[140]       | 0.80 (0.72-0.87) | 0.86 (0.78-0.93) | 5.93 (3.55-9.91)    | 0.23 (0.16-0.33) | 26.07 (12.49-54.40)    |
| Farhana, 2015[141]       | 0.95 (0.83-0.99) | 0.83 (0.63-0.95) | 5.70 (2.32-13.98)   | 0.06 (0.02-0.23) | 95.00 (15.99-564.26)   |
| He, 2015[142]            | 0.80 (0.68-0.90) | 0.93 (0.84-0.97) | 10.71 (4.91-23.38)  | 0.21 (0.12-0.36) | 50.45 (17.45-145.85)   |
| Klimiuk, 2015[143]       | 0.88 (0.75-0.96) | 0.93 (0.88-0.96) | 12.29 (6.89-21.94)  | 0.13 (0.05-0.29) | 98.11 (32.14-299.52)   |
| Koser, 2015[144]         | 0.88 (0.76-0.95) | 0.69 (0.54-0.81) | 2.80 (1.85-4.26)    | 0.17 (0.08-0.38) | 16.04 (5.68-45.29)     |
| Kumar, 2015[145]         | 0.67 (0.22-0.96) | 0.90 (0.68-0.99) | 6.67 (1.59-27.9)    | 0.37 (0.12-1.16) | 18.00 (1.92-168.99)    |
| Li, 2015[146]            | 0.88 (0.71-0.96) | 0.87 (0.76-0.95) | 6.88 (3.40-13.9)    | 0.14 (0.06-0.36) | 48.00 (12.9-178.59)    |
| Saiphoklang, 2015[147]   | 0.85 (0.72-0.94) | 0.97 (0.90-1.00) | 31.06 (7.88-122.49) | 0.15 (0.08-0.30) | 202.86 (40.2-1023.55)  |
| Shu, 2015[148]           | 0.40 (0.24-0.58) | 0.98 (0.91-1.00) | 24.00 (3.30-174.78) | 0.61 (0.46-0.80) | 39.33 (4.87-317.69)    |
| Skouras, 2015[149]       | 0.90 (0.55-1.00) | 0.80 (0.72-0.87) | 4.54 (2.96-6.96)    | 0.12 (0.02-0.80) | 36.41 (4.38-302.73)    |
| Tural Onur, 2015[150]    | 0.85 (0.72-0.93) | 0.81 (0.70-0.89) | 4.43 (2.68-7.32)    | 0.19 (0.10-0.36) | 23.27 (8.86-61.13)     |
| Yoshino, 2015[151]       | 0.90 (0.55-1.00) | 0.65 (0.38-0.86) | 2.55 (1.30-5.01)    | 0.15 (0.02-1.03) | 16.50 (1.67-163.42)    |
| Biswas, 2016[152]        | 0.78 (0.40-0.97) | 0.95 (0.84-0.99) | 16.33 (4.04-66.03)  | 0.23 (0.07-0.79) | 70.00 (8.42-582.06)    |
| Coral-Gudino, 2016[153]  | 0.99 (0.95-1.00) | 0.52 (0.46-0.58) | 2.06 (1.82-2.34)    | 0.03 (0.01-0.11) | 72.78 (17.65-300.17)   |
| Kim, 2016[154]           | 0.81 (0.61-0.93) | 0.79 (0.59-0.92) | 3.77 (1.81-7.85)    | 0.24 (0.11-0.55) | 15.40 (4.08-58.17)     |

|                        |                  |                  |                     |                  |                         |
|------------------------|------------------|------------------|---------------------|------------------|-------------------------|
| Lee, 2016[155]         | 1.00 (0.69-1.00) | 0.84 (0.71-0.93) | 5.73 (3.06-10.72)   | 0.05 (0.00-0.82) | 105.00 (5.60-1968.48)   |
| Liu, 2016[156]         | 0.95 (0.88-0.98) | 0.96 (0.80-1.00) | 24.57 (3.59-168.03) | 0.06 (0.02-0.13) | 430.00 (47.99-3852.66)  |
| Mallik, 2016[157]      | 0.97 (0.90-1.00) | 0.97 (0.84-1.00) | 31.06 (4.51-213.88) | 0.03 (0.01-0.12) | 1023.00 (89.34-11714.6) |
| Michot, 2016[158]      | 0.97 (0.85-1.00) | 0.93 (0.84-0.98) | 13.59 (5.83-31.69)  | 0.03 (0.00-0.22) | 429.00 (48.13-3823.72)  |
| Rahman, 2016[159]      | 1.00 (0.96-1.00) | 0.88 (0.62-0.98) | 6.76 (2.15-21.24)   | 0.01 (0.00-0.11) | 980.20 (44.73-21478.5)  |
| Saiphoklang, 2016[160] | 0.93 (0.77-0.93) | 0.95 (0.90-0.98) | 17.34 (8.77-34.27)  | 0.07 (0.02-0.28) | 237.94 (47.88-1182.36)  |
| Suleman, 2016[161]     | 0.89 (0.81-0.94) | 0.77 (0.65-0.87) | 3.87 (2.43-6.17)    | 0.14 (0.08-0.26) | 26.86 (11.30-63.81)     |
| Che, 2017[162]         | 0.68 (0.55-0.80) | 0.89 (0.65-0.99) | 6.15 (1.65-22.97)   | 0.36 (0.24-0.53) | 17.26 (3.60-82.76)      |
| Chung, 2017[163]       | 0.88 (0.80-0.93) | 0.94 (0.91-0.97) | 15.52 (9.11-26.45)  | 0.13 (0.08-0.22) | 119.41 (53.32-267.42)   |
| El Hoshy, 2017[164]    | 0.75 (0.51-0.91) | 0.75 (0.59-0.87) | 3.00 (1.66-5.43)    | 0.33 (0.15-0.73) | 9.00 (2.61-31.09)       |
| Kim, 2017[165]         | 0.84 (0.79-0.88) | 0.75 (0.35-0.97) | 3.36 (1.01-11.17)   | 0.21 (0.13-0.35) | 15.75 (3.08-80.58)      |
| Sivakumar, 2017[166]   | 0.96 (0.81-1.00) | 0.84 (0.75-0.90) | 5.95 (3.83-9.25)    | 0.04 (0.01-0.30) | 134.59 (17.09-1000.00)  |
| Xu, 2017[167]          | 0.62 (0.51-0.72) | 0.95 (0.88-0.99) | 12.37 (4.70-32.56)  | 0.40 (0.31-0.52) | 30.81 (10.40-91.25)     |
| Zhang, 2017[168]       | 1.00 (0.99-1.00) | 0.76 (0.66-0.85) | 4.20 (2.86-6.16)    | 0.00 (0.01-1.00) | 2230.76 (133.24-1000.0) |
| Blakiston, 2018[169]   | 0.93 (0.83-0.98) | 0.87 (0.86-0.89) | 7.31 (6.31-8.47)    | 0.08 (0.03-0.21) | 90.90 (32.55-253.87)    |
| Chang, 2018[170]       | 0.88 (0.82-0.93) | 0.88 (0.84-0.91) | 7.20 (5.62-9.23)    | 0.13 (0.09-0.21) | 53.39 (30.39-93.81)     |
| He, 2018[171]          | 0.76 (0.61-0.87) | 0.93 (0.84-0.98) | 11.33 (4.34-29.58)  | 0.26 (0.16-0.43) | 43.17 (12.93-144.09)    |
| Hong, 2018[172]        | 0.98 (0.89-1.00) | 0.96 (0.82-1.00) | 27.40 (4.00-187.9)  | 0.02 (0.01-0.15) | 1242.00 (74.61-1000.00) |
| Santos, 2018[173]      | 0.82 (0.65-0.93) | 0.96 (0.85-0.99) | 18.82 (4.84-73.68)  | 0.19 (0.09-0.39) | 99.00 (18.63-526.17)    |
| Wang, 2018[174]        | 0.88 (0.80-0.94) | 0.87 (0.81-0.91) | 6.59 (4.51-9.64)    | 0.13 (0.08-0.23) | 49.32 (23.03-105.61)    |

Figures in parentheses are 95% confidence intervals  
See Table S1 for detailed bibliography
