# Supplementary material for: Adenosine deaminase for diagnosis of tuberculous pleural effusion: A systematic review and meta-analysis
Source: PubMed Central journal article supplement (PMC6435228; doi:10.1371/journal.pone.0213728), 2019-03-26
Supplement: pone.0213728.s009.pdf [file pone.0213728.s009.pdf]

**S5 Table.** Multivariate meta-regression analysis

| Parameter                          | Category                           | Summary DOR (95% CI) | RDOR (95% CI)       | P value |
|------------------------------------|------------------------------------|----------------------|---------------------|---------|
| Year of publication:               | Up to 2000                         | 214.9 (111.2-415.1)  | -                   | 0.668   |
|                                    | 2001 to 2010                       | 92.45 (56.37-151.6)  | 0.868 (0.452-1.664) |         |
|                                    | After 2010                         | 67.73 (49.04-93.56)  | 0.610 (0.335-1.112) |         |
| Prospective study design:          | No, or not specified               | 118.6 (78.89-178.4)  | -                   | 0.295   |
|                                    | Yes                                | 88.08 (63.50-122.2)  | 0.811 (0.482-1.367) |         |
| Country's tuberculosis burden:     | Not high                           | 116.4 (83.48-162.4)  | -                   | 0.344   |
|                                    | High                               | 79.68 (52.93-119.9)  | 0.766 (0.440-1.333) |         |
| TB prevalence in study population: | <=50%                              | 70.49 (47.00-105.7)  | -                   | 0.090   |
|                                    | >50%                               | 119.7 (85.58-167.4)  | 1.520 (0.936-2.466) |         |
| Nature of pleural effusion:        | Transudates also, or not specified | 103.5 (71.69-149.4)  | -                   | 0.802   |
|                                    | Exudates only                      | 87.93 (60.87-127.0)  | 0.937 (0.564-1.559) |         |
| ADA assay technique:               | Non-Guisti, or not specified       | 81.91 (61.15-109.7)  | -                   | 0.436   |
|                                    | Guisti                             | 111.3 (74.35-166.7)  | 1.203 (0.753-1.922) |         |
| ADA diagnostic threshold:          | <36 IU/L                           | 86.32 (56.42-132.1)  | -                   | 0.198   |
|                                    | 40±4 IU/L                          | 109.5 (71.52-167.7)  | 1.478 (0.814-2.682) |         |
|                                    | 45-65 IU/L                         | 91.57 (55.05-152.3)  | 1.727 (0.996-2.995) |         |
|                                    | >65 IU/L                           | 96.55 (14.75-632.2)  | 1.971 (0.408-9.509) |         |
| Total study sample size:           | <=100 patients                     | 77.57 (52.68-114.2)  | -                   | 0.002   |
|                                    | >100 patients                      | 123.7 (87.48-175.0)  | 2.092 (1.329-3.295) |         |
| Blinding in study:                 | No, or not specified               | 117.0 (87.40-156.6)  | -                   | 0.018   |
|                                    | Yes                                | 37.85 (22.26-64.34)  | 0.471 (0.253-0.876) |         |
| Reference standard:                | Composite, or not specified        | 89.00 (62.30-127.1)  | -                   | 0.970   |
|                                    | Definite                           | 110.2 (73.69-164.7)  | 0.991 (0.617-1.590) |         |
| Constant                           |                                    | -                    | 51.07 (20.44-127.6) | 0.000   |

Tau<sup>2</sup> = 1.165; I<sup>2</sup> (% residual variation due to heterogeneity) = 67.95%; Adjusted R<sup>2</sup> (proportion of between study variance explained by predictors) = 17.51%; Joint test for all covariates with Knapp-Hartung modification model F(13,160) = 2.42 (p 0.005).

95%CI 95% confidence interval, ADA Adenosine deaminase, DOR Diagnostic odds ratio, RDOR Relative diagnostic odds ratio
